# Supplementary material for: Peptide Hemolytic Activity Analysis using Visual Data Mining of Similarity-based Complex Networks
Source: Preprints.org preprint supplement (doi:10.20944/preprints202303.0322.v1), 2023-03-17
Supplement: Supplementary file 1 [file supplementary]

## Sheet: HC_G_0.40
Unique Set A		Unique Set B		A ∩ B	A U B	% A ∩ B / A U B	Unique A / Unique B
AS	85	Bh	87	250	422	59.2417	0.977011
AS	85	Ch	94	250	429	58.2751	0.904255
AS	90	Eu	91	245	426	57.5117	0.989011
Bh	68	Ch	75	269	412	65.2913	0.906667
Bh	58	Eu	57	279	394	70.8122	1.01754
Ch	70	Eu	62	274	406	67.4877	1.12903
Eu	74	So	73	262	409	64.0587	1.0137
So	102	AS	102	233	437	53.3181	1
So	77	Bh	79	258	414	62.3188	0.974684
So	86	Ch	95	249	430	57.907	0.905263

## Sheet: HC_G_0.50
Unique Set A		Unique Set B		A ∩ B	A U B	% A ∩ B / A U B	Unique A / Unique B
AS	109	Bh	114	336	559	60.1073	0.95614
AS	110	Ch	116	335	561	59.7148	0.948276
AS	114	Eu	121	331	566	58.4806	0.942149
Bh	87	Ch	88	363	538	67.4721	0.988636
Bh	70	Eu	72	380	522	72.7969	0.972222
Ch	81	Eu	82	370	533	69.4184	0.987805
Eu	70	So	71	382	523	73.0402	0.985915
So	120	AS	112	333	565	58.9381	1.07143
So	82	Bh	79	371	532	69.7368	1.03797
So	99	Ch	101	352	552	63.7681	0.980198

## Sheet: HC_G_0.60
Unique Set A		Unique Set B		A ∩ B	A U B	% A ∩ B / A U B	Unique A / Unique B
AS	118	Bh	117	463	698	66.3324	1.00855
AS	123	Ch	119	458	700	65.4286	1.03361
AS	124	Eu	120	457	701	65.1926	1.03333
Bh	98	Ch	95	482	675	71.4074	1.03158
Bh	73	Eu	70	507	650	78	1.04286
Ch	90	Eu	90	487	667	73.0135	1
Eu	74	So	78	503	655	76.7939	0.948718
So	129	AS	129	452	710	63.662	1
So	79	Bh	78	502	659	76.176	1.01282
So	109	Ch	105	472	686	68.8047	1.0381

## Sheet: HC_G_0.70
Unique Set A		Unique Set B		A ∩ B	A U B	% A ∩ B / A U B	Unique A / Unique B
AS	143	Bh	134	580	857	67.6779	1.06716
AS	135	Ch	138	588	861	68.2927	0.978261
AS	143	Eu	138	580	861	67.3635	1.03623
Bh	88	Ch	100	626	814	76.9042	0.88
Bh	73	Eu	77	641	791	81.0367	0.948052
Ch	98	Eu	90	628	816	76.9608	1.08889
Eu	84	So	81	634	799	79.3492	1.03704
So	138	AS	146	577	861	67.0151	0.945205
So	81	Bh	80	634	795	79.7484	1.0125
So	107	Ch	118	608	833	72.9892	0.90678

## Sheet: HC_G_0.80
Unique Set A		Unique Set B		A ∩ B	A U B	% A ∩ B / A U B	Unique A / Unique B
AS	125	Bh	136	771	1032	74.7093	0.919118
AS	136	Ch	137	760	1033	73.5721	0.992701
AS	134	Eu	141	762	1037	73.4812	0.950355
Bh	98	Ch	88	809	995	81.3065	1.11364
Bh	73	Eu	69	834	976	85.4508	1.05797
Ch	89	Eu	95	808	992	81.4516	0.936842
Eu	82	So	76	821	979	83.8611	1.07895
So	141	AS	140	756	1037	72.9026	1.00714
So	85	Bh	95	812	992	81.8548	0.894737
So	105	Ch	105	792	1002	79.0419	1

## Sheet: HC_G_0.90
Unique Set A		Unique Set B		A ∩ B	A U B	% A ∩ B / A U B	Unique A / Unique B
AS	107	Bh	123	1111	1341	82.8486	0.869919
AS	107	Ch	121	1111	1339	82.9724	0.884298
AS	115	Eu	133	1103	1351	81.6432	0.864662
Bh	75	Ch	73	1159	1307	88.6764	1.0274
Bh	50	Eu	52	1184	1286	92.0684	0.961538
Ch	73	Eu	77	1159	1309	88.5409	0.948052
Eu	60	So	55	1176	1291	91.0922	1.09091
So	125	AS	112	1106	1343	82.3529	1.11607
So	65	Bh	68	1166	1299	89.7614	0.955882
So	79	Ch	80	1152	1311	87.8719	0.9875

## Sheet: HC_G_All Cuttofs
	0.4	0.5	0.6	0.7	0.8	0.9
AS_Bh	59.2417	60.1073	66.3324	67.6779	74.7093	82.8486
AS_Ch	58.2751	59.7148	65.4286	68.2927	73.5721	82.9724
AS_Eu	57.5117	58.4806	65.1926	67.3635	73.4812	81.6432
Bh_Ch	65.2913	67.4721	71.4074	76.9042	81.3065	88.6764
Bh_Eu	70.8122	72.7969	78	81.0367	85.4508	92.0684
Ch_Eu	67.4877	69.4184	73.0135	76.9608	81.4516	88.5409
Eu_So	64.0587	73.0402	76.7939	79.3492	83.8611	91.0922
So_AS	53.3181	58.9381	63.662	67.0151	72.9026	82.3529
So_Bh	62.3188	69.7368	76.176	79.7484	81.8548	89.7614
So_Ch	57.907	63.7681	68.8047	72.9892	79.0419	87.8719

## Sheet: HC_L_0.40
Unique Set A		Unique Set B		A ∩ B	A U B	% A ∩ B / A U B	Unique A / Unique B
AS	59	Bh	64	145	268	54.1045	0.921875
AS	64	Ch	70	140	274	51.0949	0.914286
AS	63	Eu	76	141	280	50.3571	0.828947
Bh	54	Ch	55	155	264	58.7121	0.981818
Bh	38	Eu	46	171	255	67.0588	0.826087
Ch	54	Eu	61	156	271	57.5646	0.885246
Eu	61	So	52	156	269	57.9926	1.17308
So	70	AS	66	138	274	50.365	1.06061
So	52	Bh	53	156	261	59.7701	0.981132
So	75	Ch	77	133	285	46.6667	0.974026

## Sheet: HC_L_0.50
Unique Set A		Unique Set B		A ∩ B	A U B	% A ∩ B / A U B	Unique A / Unique B
AS	71	Bh	77	248	396	62.6263	0.922078
AS	81	Ch	91	238	410	58.0488	0.89011
AS	84	Eu	92	235	411	57.1776	0.913043
Bh	74	Ch	78	251	403	62.2829	0.948718
Bh	55	Eu	57	270	382	70.6806	0.964912
Ch	69	Eu	67	260	396	65.6566	1.02985
Eu	64	So	60	263	387	67.9587	1.06667
So	88	AS	84	235	407	57.7396	1.04762
So	69	Bh	71	254	394	64.467	0.971831
So	86	Ch	92	237	415	57.1084	0.934783

## Sheet: HC_L_0.60
Unique Set A		Unique Set B		A ∩ B	A U B	% A ∩ B / A U B	Unique A / Unique B
AS	102	Bh	106	346	554	62.4549	0.962264
AS	104	Ch	110	344	558	61.6487	0.945455
AS	101	Eu	111	347	559	62.0751	0.90991
Bh	84	Ch	86	368	538	68.4015	0.976744
Bh	58	Eu	64	394	516	76.3566	0.90625
Ch	79	Eu	83	375	537	69.8324	0.951807
Eu	69	So	65	389	523	74.3786	1.06154
So	111	AS	105	343	559	61.3596	1.05714
So	75	Bh	73	379	527	71.9165	1.0274
So	105	Ch	105	349	559	62.4329	1

[truncated: 4 more sheets: HC_L_0.70, HC_L_0.80, HC_L_0.90, HC_L_All Cuttofs]
