# Supplementary material for: Peptide Hemolytic Activity Analysis using Visual Data Mining of Similarity-based Complex Networks
Source: Preprints.org preprint supplement (doi:10.20944/preprints202303.0322.v1), 2023-03-17
Supplement: Supplementary file 2 [file SM3.6_Table_Network_Parameters.xlsx]

## Sheet: Best Networks
No	Metrics	Similarity_Cutoff	Edges	Modularity	Density	Av_Cluster_Coeff	Clusters	Singletons (GC)	Singletons (D0)	Diameter	Av_Path_Length	Av_degree	Clusters (no D0)	Mod/Den
1	Angular Separation	0	26471	0.49	0.02	0.183	8	0	0	5	2.841	32.145	8	24.5
2	Angular Separation	0.9	25065	0.499	0.018	0.205	32	47	17	7	2.935	30.437	15	27.7222
3	Bhattacharyya	0	10555	0.456	0.008	0.025	8	0	0	6	3.428	12.817	8	57
4	Bhattacharyya	0.75	9364	0.472	0.007	0.028	40	56	23	8	3.627	11.371	17	67.4286
5	Chebyshev	0	22431	0.313	0.017	0.021	7	0	0	3	2.648	27.239	7	18.4118
6	Chebyshev	0.65	16809	0.376	0.012	0.032	41	51	29	7	2.913	20.412	12	31.3333
7	Euclidean	0	10498	0.466	0.008	0.026	9	0	0	7	3.448	12.748	9	58.25
8	Euclidean	0.7	8482	0.494	0.006	0.03	41	55	21	10	3.89	10.3	20	82.3333
9	Soergel	0	12077	0.441	0.009	0.024	8	0	0	6	3.232	14.665	8	49
10	Soergel	0.7	9521	0.496	0.007	0.028	44	60	27	11	3.704	11.562	17	70.8571

## Sheet: AngularSep_HSPN
No	Similarity Cutoff	Edges	Modularity	Density	Av_Cluster_Coeff	Clusters (N. Communities)	Singletons (Giant Component)	Singletones (Degree 0)	Diameter	Av_Path_Length	Av_degree	Clusters (no zero degree)
1	0	26471	0.49	0.02	0.183	8	0	0	5	2.84185	32.145	8
2	0.5	26468	0.49	0.02	0.184	9	0	0	5	2.8425	32.141	9
3	0.55	26460	0.491	0.02	0.184	9	0	0	5	2.84371	32.131	9
4	0.6	26448	0.492	0.02	0.184	9	0	0	5	2.84615	32.117	9
5	0.65	26402	0.493	0.019	0.185	9	0	0	6	2.85337	32.061	9
6	0.7	26345	0.489	0.019	0.185	8	0	0	6	2.86062	31.991	8
7	0.75	26273	0.494	0.019	0.186	8	0	0	6	2.86878	31.904	8
8	0.8	26130	0.486	0.019	0.189	8	1	1	8	2.89445	31.73	7
9	0.85	25877	0.492	0.019	0.194	15	11	3	8	2.90929	31.423	12
10	0.9	25065	0.499	0.018	0.205	32	47	17	7	2.93452	30.437	15
11	0.95	20563	0.55	0.015	0.281	87	103	63	12	3.42175	24.97	24

## Sheet: Bhattacharyya_HSPN
No	Similarity Cutoff	Edges	Modularity	Density	Av_Cluster_Coeff	Clusters (N. Communities)	Singletons (Giant Component)	Singletones (Degree 0)	Diameter	Av_Path_Length	Av_degree	Clusters (no zero degree)
1	0	10555	0.456	0.008	0.025	8	0	0	6	3.42818	12.817	8
2	0.5	10437	0.457	0.008	0.026	9	0	0	7	3.45789	12.674	9
3	0.55	10310	0.457	0.008	0.026	10	1	1	8	3.48986	12.52	9
4	0.6	10218	0.461	0.008	0.026	10	1	1	11	3.55834	12.408	9
5	0.65	10108	0.47	0.007	0.027	13	35	3	8	3.47824	12.274	10
6	0.7	9886	0.456	0.007	0.027	29	40	15	11	3.54675	12.005	14
7	0.75	9364	0.472	0.007	0.028	40	56	23	8	3.62741	11.371	17
8	0.8	8078	0.512	0.006	0.029	64	80	42	12	4.00471	9.809	22
9	0.85	5079	0.609	0.004	0.03	144	185	107	17	5.39569	6.168	37
10	0.9	1657	0.919	0.001	0.024	571	1085	427	30	10.0287	2.012	144
11	0.95	508	0.946	0	0.011	1230	1597	1063	11	2.73361	0.617	167

## Sheet: Chebyshev_HSPN
No	Similarity Cutoff	Edges	Modularity	Density	Av_Cluster_Coeff	Clusters (N. Communities)	Singletons (Giant Component)	Singletones (Degree 0)	Diameter	Av_Path_Length	Av_degree	Clusters (no zero degree)
1	0	22431	0.313	0.017	0.021	7	0	0	3	2.64827	27.239	7
2	0.5	21418	0.317	0.016	0.023	9	1	1	6	2.70446	26.009	8
3	0.55	20721	0.331	0.015	0.025	19	14	8	6	2.72522	25.162	11
4	0.6	19444	0.335	0.014	0.028	29	26	15	9	2.79183	20.412	14
5	0.65	16809	0.376	0.012	0.032	41	51	29	7	2.91341	20.412	12
6	0.7	12629	0.423	0.009	0.041	85	85	68	11	3.34705	15.336	17
7	0.75	7420	0.543	0.005	0.058	177	256	141	14	4.13277	9.01	36
8	0.8	2860	0.768	0.002	0.082	453	667	364	15	5.83078	3.473	89
9	0.85	1084	0.938	0.001	0.133	941	1529	773	18	5.38866	1.316	168
10	0.9	471	0.892	0	0.178	1322	1598	1181	8	2.33399	0.572	141
11	0.95	74	0.9	0	0.063	1579	1630	1533	7	2.35533	0.09	46

## Sheet: Euclidean_HSPN
No	Similarity Cutoff	Edges	Modularity	Density	Av_Cluster_Coeff	Clusters (N. Communities)	Singletons (Giant Component)	Singletones (Degree 0)	Diameter	Av_Path_Length	Av_degree	Clusters (no zero degree)
1	0	10498	0.466	0.008	0.026	9	0	0	7	3.4484	12.748	9
2	0.5	10333	0.475	0.008	0.027	9	0	0	7	3.48868	12.548	9
3	0.55	10160	0.464	0.007	0.027	10	1	1	8	3.52421	12.338	9
4	0.6	9905	0.471	0.007	0.027	12	2	2	13	3.62582	12.028	10
5	0.65	9455	0.479	0.007	0.028	23	28	12	15	3.71524	11.481	11
6	0.7	8482	0.494	0.006	0.03	41	55	21	10	3.88974	10.3	20
7	0.75	6607	0.568	0.005	0.03	82	102	57	14	4.57371	8.023	25
8	0.8	3835	0.709	0.003	0.028	219	371	162	22	6.14765	4.657	57
9	0.85	1664	0.932	0.001	0.022	547	1240	409	24	8.11066	2.021	138
10	0.9	823	0.958	0.001	0.015	998	1593	810	13	3.33281	0.999	188
11	0.95	235	0.929	0	0.014	1440	1611	1333	9	2.81024	0.285	107

## Sheet: Soergel_HSPN
No	Similarity Cutoff	Edges	Modularity	Density	Av_Cluster_Coeff	Clusters (N. Communities)	Singletons (Giant Component)	Singletones (Degree 0)	Diameter	Av_Path_Length	Av_degree	Clusters (no zero degree)
1	0	12077	0.441	0.009	0.024	8	0	0	6	3.23175	14.665	8
2	0.5	11813	0.445	0.009	0.024	9	1	1	7	3.27348	14.345	8
3	0.55	11597	0.449	0.009	0.025	9	2	2	8	3.31251	14.083	7
4	0.6	11249	0.453	0.008	0.025	17	10	7	11	3.38297	13.66	10
5	0.65	10641	0.463	0.008	0.027	25	25	11	10	3.4786	12.922	14
6	0.7	9521	0.496	0.007	0.028	44	60	27	11	3.7039	11.562	17
7	0.75	7326	0.558	0.005	0.03	85	116	58	13	4.30542	8.896	27
8	0.8	4103	0.719	0.003	0.031	200	312	145	25	6.53527	4.982	55
9	0.85	1777	0.929	0.001	0.028	524	1168	384	25	9.75714	2.158	140
10	0.9	934	0.966	0.001	0.017	902	1593	689	12	3.37915	1.134	213
11	0.95	324	0.945	0	0.01	1364	1605	1229	6	2.6234	0.393	135

## Sheet: Total_HSPN
Metrics	Similarity_Cutoff	Edges	Modularity	Density	ACC	No. Clusters	Singletons (GC)	Singletons (D0)	Diameter	APL	Average_Degree
Euclidean	0	10498	0.466	0.008	0.026	9	0	0	7	3.4484	12.748
Euclidean	0.5	10333	0.475	0.008	0.027	9	0	0	7	3.48868	12.548
Euclidean	0.55	10160	0.464	0.007	0.027	10	1	1	8	3.52421	12.338
Euclidean	0.6	9905	0.471	0.007	0.027	12	2	2	13	3.62582	12.028
Euclidean	0.65	9455	0.479	0.007	0.028	23	28	12	15	3.71524	11.481
Euclidean	0.7	8482	0.494	0.006	0.03	41	55	21	10	3.88974	10.3
Euclidean	0.75	6607	0.568	0.005	0.03	82	102	57	14	4.57371	8.023
Euclidean	0.8	3835	0.709	0.003	0.028	219	371	162	22	6.14765	4.657
Euclidean	0.85	1664	0.932	0.001	0.022	547	1240	409	24	8.11066	2.021
Euclidean	0.9	823	0.958	0.001	0.015	998	1593	810	13	3.33281	0.999
Euclidean	0.95	235	0.929	0	0.014	1440	1611	1333	9	2.81024	0.285
Chebyshev	0	22431	0.313	0.017	0.021	7	0	0	3	2.64827	27.239
Chebyshev	0.5	21418	0.317	0.016	0.023	9	1	1	6	2.70446	26.009
Chebyshev	0.55	20721	0.331	0.015	0.025	19	14	8	6	2.72522	25.162
Chebyshev	0.6	19444	0.335	0.014	0.028	29	26	15	9	2.79183	20.412
Chebyshev	0.65	16809	0.376	0.012	0.032	41	51	29	7	2.91341	20.412
Chebyshev	0.7	12629	0.423	0.009	0.041	85	85	68	11	3.34705	15.336
Chebyshev	0.75	7420	0.543	0.005	0.058	177	256	141	14	4.13277	9.01
Chebyshev	0.8	2860	0.768	0.002	0.082	453	667	364	15	5.83078	3.473
Chebyshev	0.85	1084	0.938	0.001	0.133	941	1529	773	18	5.38866	1.316
Chebyshev	0.9	471	0.892	0	0.178	1322	1598	1181	8	2.33399	0.572
Chebyshev	0.95	74	0.9	0	0.063	1579	1630	1533	7	2.35533	0.09
Soergel	0	12077	0.441	0.009	0.024	8	0	0	6	3.23175	14.665
Soergel	0.5	11813	0.445	0.009	0.024	9	1	1	7	3.27348	14.345
Soergel	0.55	11597	0.449	0.009	0.025	9	2	2	8	3.31251	14.083
Soergel	0.6	11249	0.453	0.008	0.025	17	10	7	11	3.38297	13.66
Soergel	0.65	10641	0.463	0.008	0.027	25	25	11	10	3.4786	12.922
Soergel	0.7	9521	0.496	0.007	0.028	44	60	27	11	3.7039	11.562
Soergel	0.75	7326	0.558	0.005	0.03	85	116	58	13	4.30542	8.896
Soergel	0.8	4103	0.719	0.003	0.031	200	312	145	25	6.53527	4.982
Soergel	0.85	1777	0.929	0.001	0.028	524	1168	384	25	9.75714	2.158
Soergel	0.9	934	0.966	0.001	0.017	902	1593	689	12	3.37915	1.134
Soergel	0.95	324	0.945	0	0.01	1364	1605	1229	6	2.6234	0.393
Bhattacharyya	0	10555	0.456	0.008	0.025	8	0	0	6	3.42818	12.817
Bhattacharyya	0.5	10437	0.457	0.008	0.026	9	0	0	7	3.45789	12.674
Bhattacharyya	0.55	10310	0.457	0.008	0.026	10	1	1	8	3.48986	12.52
Bhattacharyya	0.6	10218	0.461	0.008	0.026	10	1	1	11	3.55834	12.408
Bhattacharyya	0.65	10108	0.47	0.007	0.027	13	35	3	8	3.47824	12.274
Bhattacharyya	0.7	9886	0.456	0.007	0.027	29	40	15	11	3.54675	12.005
Bhattacharyya	0.75	9364	0.472	0.007	0.028	40	56	23	8	3.62741	11.371
Bhattacharyya	0.8	8078	0.512	0.006	0.029	64	80	42	12	4.00471	9.809
Bhattacharyya	0.85	5079	0.609	0.004	0.03	144	185	107	17	5.39569	6.168
Bhattacharyya	0.9	1657	0.919	0.001	0.024	571	1085	427	30	10.0287	2.012
Bhattacharyya	0.95	508	0.946	0	0.011	1230	1597	1063	11	2.73361	0.617
Angular_Separation	0	26471	0.49	0.02	0.183	8	0	0	5	2.84185	32.145
Angular_Separation	0.5	26468	0.49	0.02	0.184	9	0	0	5	2.8425	32.141
Angular_Separation	0.55	26460	0.491	0.02	0.184	9	0	0	5	2.84371	32.131
Angular_Separation	0.6	26448	0.492	0.02	0.184	9	0	0	5	2.84615	32.117
Angular_Separation	0.65	26402	0.493	0.019	0.185	9	0	0	6	2.85337	32.061
Angular_Separation	0.7	26345	0.489	0.019	0.185	8	0	0	6	2.86062	31.991
Angular_Separation	0.75	26273	0.494	0.019	0.186	8	0	0	6	2.86878	31.904
Angular_Separation	0.8	26130	0.486	0.019	0.189	8	1	1	8	2.89445	31.73
Angular_Separation	0.85	25877	0.492	0.019	0.194	15	11	3	8	2.90929	31.423
Angular_Separation	0.9	25065	0.499	0.018	0.205	32	47	17	7	2.93452	30.437
Angular_Separation	0.95	20563	0.55	0.015	0.281	87	103	63	12	3.42175	24.97
