# Supplementary material for: Peptide Hemolytic Activity Analysis using Visual Data Mining of Similarity-based Complex Networks
Source: Preprints.org preprint supplement (doi:10.20944/preprints202303.0322.v1), 2023-03-17
Supplement: Supplementary file 3 [file SM4.3.1.1_No-cutoff-t_HB.xlsx]

## Sheet: HB_G_0.40
Unique Set A		Unique Set B		A ∩ B	A U B	% A ∩ B / A U B	Unique A / Unique B
AS	107	Bh	120	220	447	49.217	0.891667
AS	118	Ch	133	209	460	45.4348	0.887218
AS	112	Eu	129	215	456	47.1491	0.868217
Bh	97	Ch	99	243	439	55.3531	0.979798
Bh	76	Eu	80	264	420	62.8571	0.95
Ch	92	Eu	94	250	436	57.3394	0.978723
Eu	90	So	84	254	428	59.3458	1.07143
So	113	AS	102	225	440	51.1364	1.10784
So	90	Bh	92	248	430	57.6744	0.978261
So	94	Ch	98	244	436	55.9633	0.959184

## Sheet: HB_G_0.50
Unique Set A		Unique Set B		A ∩ B	A U B	% A ∩ B / A U B	Unique A / Unique B
AS	129	Bh	139	318	586	54.2662	0.928058
AS	136	Ch	149	311	596	52.1812	0.912752
AS	130	Eu	137	317	584	54.2808	0.948905
Bh	125	Ch	128	332	585	56.7521	0.976562
Bh	92	Eu	89	365	546	66.8498	1.03371
Ch	132	Eu	126	328	586	55.9727	1.04762
Eu	103	So	109	351	563	62.3446	0.944954
So	135	AS	122	325	582	55.8419	1.10656
So	113	Bh	110	347	570	60.8772	1.02727
So	127	Ch	127	333	587	56.7291	1

## Sheet: HB_G_0.60
Unique Set A		Unique Set B		A ∩ B	A U B	% A ∩ B / A U B	Unique A / Unique B
AS	150	Bh	145	436	731	59.6443	1.03448
AS	160	Ch	159	426	745	57.1812	1.00629
AS	151	Eu	156	436	743	58.681	0.967949
Bh	127	Ch	131	454	712	63.764	0.969466
Bh	90	Eu	100	491	681	72.0999	0.9
Ch	131	Eu	137	454	722	62.8809	0.956204
Eu	108	So	103	483	694	69.5965	1.04854
So	149	AS	149	437	735	59.4558	1
So	113	Bh	108	473	694	68.1556	1.0463
So	141	Ch	140	445	726	61.2948	1.00714

## Sheet: HB_G_0.70
Unique Set A		Unique Set B		A ∩ B	A U B	% A ∩ B / A U B	Unique A / Unique B
AS	148	Bh	148	580	876	66.21	1
AS	162	Ch	166	566	894	63.311	0.975904
AS	158	Eu	165	570	893	63.8298	0.957576
Bh	141	Ch	145	587	873	67.2394	0.972414
Bh	99	Eu	106	629	834	75.4197	0.933962
Ch	130	Eu	133	602	865	69.5954	0.977444
Eu	108	So	101	627	836	75	1.06931
So	147	AS	147	581	875	66.4	1
So	101	Bh	101	627	829	75.6333	1
So	141	Ch	145	587	873	67.2394	0.972414

## Sheet: HB_G_0.80
Unique Set A		Unique Set B		A ∩ B	A U B	% A ∩ B / A U B	Unique A / Unique B
AS	145	Bh	145	764	1054	72.4858	1
AS	158	Ch	152	751	1061	70.7823	1.03947
AS	155	Eu	153	754	1062	70.9981	1.01307
Bh	131	Ch	125	778	1034	75.2418	1.048
Bh	89	Eu	87	820	996	82.3293	1.02299
Ch	127	Eu	131	776	1034	75.0484	0.969466
Eu	87	So	83	820	990	82.8283	1.04819
So	144	AS	150	759	1053	72.0798	0.96
So	92	Bh	98	811	1001	81.019	0.938776
So	134	Ch	134	769	1037	74.1562	1

## Sheet: HB_G_0.90
Unique Set A		Unique Set B		A ∩ B	A U B	% A ∩ B / A U B	Unique A / Unique B
AS	98	Bh	103	1133	1334	84.9325	0.951456
AS	117	Ch	116	1114	1347	82.7023	1.00862
AS	105	Eu	113	1126	1344	83.7798	0.929204
Bh	98	Ch	92	1138	1328	85.6928	1.06522
Bh	70	Eu	73	1166	1309	89.0756	0.958904
Ch	104	Eu	113	1126	1343	83.8421	0.920354
Eu	77	So	67	1162	1306	88.974	1.14925
So	109	AS	111	1120	1340	83.5821	0.981982
So	69	Bh	76	1160	1305	88.8889	0.907895
So	108	Ch	109	1121	1338	83.7818	0.990826

## Sheet: HB_G_All Cuttofs
	0.4	0.5	0.6	0.7	0.8	0.9
AS_Bh	49.217	54.2662	59.6443	66.21	72.4858	84.9325
AS_Ch	45.4348	52.1812	57.1812	63.311	70.7823	82.7023
AS_Eu	47.1491	54.2808	58.681	63.8298	70.9981	83.7798
Bh_Ch	55.3531	56.7521	63.764	67.2394	75.2418	85.6928
Bh_Eu	62.8571	66.8498	72.0999	75.4197	82.3293	89.0756
Ch_Eu	57.3394	55.9727	62.8809	69.5954	75.0484	83.8421
Eu_So	59.3458	62.3446	69.5965	75	82.8283	88.974
So_AS	51.1364	55.8419	59.4558	66.4	72.0798	83.5821
So_Bh	57.6744	60.8772	68.1556	75.6333	81.019	88.8889
So_Ch	55.9633	56.7291	61.2948	67.2394	74.1562	83.7818

## Sheet: HB_L_0.40
Unique Set A		Unique Set B		A ∩ B	A U B	% A ∩ B / A U B	Unique A / Unique B
AS	78	Bh	92	112	282	39.7163	0.847826
AS	90	Ch	95	100	285	35.0877	0.947368
AS	87	Eu	92	103	282	36.5248	0.945652
Bh	79	Ch	70	125	274	45.6204	1.12857
Bh	68	Eu	59	136	263	51.711	1.15254
Ch	72	Eu	72	123	267	46.0674	1
Eu	64	So	70	131	265	49.434	0.914286
So	88	AS	77	113	278	40.6475	1.14286
So	76	Bh	79	125	280	44.6429	0.962025
So	79	Ch	73	122	274	44.5255	1.08219

## Sheet: HB_L_0.50
Unique Set A		Unique Set B		A ∩ B	A U B	% A ∩ B / A U B	Unique A / Unique B
AS	109	Bh	131	195	435	44.8276	0.832061
AS	117	Ch	129	187	433	43.1871	0.906977
AS	109	Eu	127	195	431	45.2436	0.858268
Bh	112	Ch	102	214	428	50	1.09804
Bh	85	Eu	81	241	407	59.2138	1.04938
Ch	101	Eu	107	215	423	50.8274	0.943925
Eu	86	So	91	236	413	57.1429	0.945055
So	126	AS	103	201	430	46.7442	1.2233
So	99	Bh	98	228	425	53.6471	1.0102
So	108	Ch	97	219	424	51.6509	1.1134

## Sheet: HB_L_0.60
Unique Set A		Unique Set B		A ∩ B	A U B	% A ∩ B / A U B	Unique A / Unique B
AS	138	Bh	139	319	596	53.5235	0.992806
AS	137	Ch	148	320	605	52.8926	0.925676
AS	147	Eu	142	310	599	51.7529	1.03521
Bh	120	Ch	130	338	588	57.483	0.923077
Bh	98	Eu	92	360	550	65.4545	1.06522
Ch	135	Eu	119	333	587	56.7291	1.13445
Eu	96	So	102	356	554	64.2599	0.941176
So	136	AS	135	322	593	54.3002	1.00741
So	110	Bh	110	348	568	61.2676	1
So	120	Ch	130	338	588	57.483	0.923077

[truncated: 4 more sheets: HB_L_0.70, HB_L_0.80, HB_L_0.90, HB_L_All Cuttofs]
