# Supplementary material for: Peptide Hemolytic Activity Analysis using Visual Data Mining of Similarity-based Complex Networks
Source: Preprints.org preprint supplement (doi:10.20944/preprints202303.0322.v1), 2023-03-17
Supplement: Supplementary file 5 [file SM4.3.2.1_HB.xlsx]

## Sheet: HB_G
	Unique Set A		Unique Set B		A ∩ B	A U B	% A ∩ B / A U B	Unique A / Unique B
0.4	0.00_AS	72	0.90_AS	84	255	411	62.0438	0.857143
	0.00_Ch	58	0.65_Ch	54	284	396	71.7172	1.07407
	0.00_Eu	37	0.70_Eu	36	307	380	80.7895	1.02778
0.5	0.00_AS	86	0.90_AS	91	361	538	67.1004	0.945055
	0.00_Ch	77	0.65_Ch	66	384	527	72.8653	1.16667
	0.00_Eu	53	0.70_Eu	50	401	504	79.5635	1.06
0.6	0.00_AS	88	0.90_AS	89	498	675	73.7778	0.988764
	0.00_Ch	79	0.65_Ch	76	506	661	76.5507	1.03947
	0.00_Eu	50	0.70_Eu	43	541	634	85.3312	1.16279
0.7	0.00_AS	95	0.90_AS	91	633	819	77.2894	1.04396
	0.00_Ch	73	0.65_Ch	72	659	804	81.9652	1.01389
	0.00_Eu	58	0.70_Eu	53	677	788	85.9137	1.09434
0.8	0.00_AS	79	0.90_AS	82	830	991	83.7538	0.963415
	0.00_Ch	60	0.65_Ch	57	843	960	87.8125	1.05263
	0.00_Eu	52	0.70_Eu	49	855	956	89.4351	1.06122
0.9	0.00_AS	51	0.90_AS	49	1180	1280	92.1875	1.04082
	0.00_Ch	44	0.65_Ch	46	1186	1276	92.9467	0.956522
	0.00_Eu	31	0.70_Eu	29	1208	1268	95.2681	1.06897

## Sheet: HB_G_Plot
	0.4	0.5	0.6	0.7	0.8	0.9
AS(0.00)_AS(0.90)	62.0438	67.1004	73.7778	77.2894	83.7538	92.1875
Ch(0.00)_Ch(0.65)	71.7172	72.8653	76.5507	81.9652	87.8125	92.9467
Eu(0.00)_Eu(0.70)	80.7895	79.5635	85.3312	85.9137	89.4351	95.2681

## Sheet: HB_L
	Unique Set A		Unique Set B		A ∩ B	A U B	% A ∩ B / A U B	Unique A / Unique B
0.4	0.00_AS	66	0.90_AS	75	124	265	46.7925	0.88
	0.00_Ch	46	0.65_Ch	53	149	248	60.0806	0.867925
	0.00_Eu	42	0.70_Eu	45	153	240	63.75	0.933333
0.5	0.00_AS	83	0.90_AS	105	221	409	54.0342	0.790476
	0.00_Ch	57	0.65_Ch	64	259	380	68.1579	0.890625
	0.00_Eu	48	0.70_Eu	46	274	368	74.4565	1.04348
0.6	0.00_AS	97	0.90_AS	95	360	552	65.2174	1.02105
	0.00_Ch	71	0.65_Ch	58	397	526	75.4753	1.22414
	0.00_Eu	50	0.70_Eu	42	402	494	81.3765	1.19048
0.7	0.00_AS	93	0.90_AS	96	502	691	72.6483	0.96875
	0.00_Ch	74	0.65_Ch	69	527	670	78.6567	1.07246
	0.00_Eu	53	0.70_Eu	51	543	647	83.9258	1.03922
0.8	0.00_AS	95	0.90_AS	97	687	879	78.157	0.979381
	0.00_Ch	79	0.65_Ch	69	708	856	82.7103	1.14493
	0.00_Eu	66	0.70_Eu	55	728	849	85.7479	1.2
0.9	0.00_AS	66	0.90_AS	64	1058	1188	89.0572	1.03125
	0.00_Ch	50	0.65_Ch	52	1077	1179	91.3486	0.961538
	0.00_Eu	48	0.70_Eu	44	1085	1177	92.1835	1.09091

## Sheet: HB_L_Plot
	0.4	0.5	0.6	0.7	0.8	0.9
AS(0.00)_AS(0.90)	46.7925	54.0342	65.2174	72.6483	78.157	89.0572
Ch(0.00)_Ch(0.65)	60.0806	68.1579	75.4753	78.6567	82.7103	91.3486
Eu(0.00)_Eu(0.70)	63.75	74.4565	81.3765	83.9258	85.7479	92.1835
