# Supplementary material for: Peptide Hemolytic Activity Analysis using Visual Data Mining of Similarity-based Complex Networks
Source: Preprints.org preprint supplement (doi:10.20944/preprints202303.0322.v1), 2023-03-17
Supplement: Supplementary file 6 [file SM4.3.2.2_HC.xlsx]

## Sheet: HC_G
	Unique Set A		Unique Set B		A ∩ B	A U B	% A ∩ B / A U B	Unique A / Unique B
0.4	0.00_AS	2	0.90_AS	2	333	337	98.8131	1
	0.00_Ch	16	0.65_Ch	14	328	358	91.6201	1.14286
	0.00_Eu	15	0.70_Eu	14	321	350	91.7143	1.07143
0.5	0.00_AS	2	0.90_AS	2	443	447	99.1051	1
	0.00_Ch	24	0.65_Ch	23	427	474	90.0844	1.04348
	0.00_Eu	18	0.70_Eu	18	434	470	92.3404	1
0.6	0.00_AS	0	0.90_AS	0	581	581	100	#DIV/0!
	0.00_Ch	22	0.65_Ch	22	555	599	92.6544	1
	0.00_Eu	20	0.70_Eu	21	557	598	93.1438	0.952381
0.7	0.00_AS	0	0.90_AS	1	723	724	99.8619	0
	0.00_Ch	22	0.65_Ch	17	704	743	94.751	1.29412
	0.00_Eu	20	0.70_Eu	20	698	738	94.5799	1
0.8	0.00_AS	1	0.90_AS	2	895	898	99.6659	0.5
	0.00_Ch	22	0.65_Ch	25	875	922	94.9024	0.88
	0.00_Eu	16	0.70_Eu	16	887	919	96.518	1
0.9	0.00_AS	0	0.90_AS	0	1218	1218	100	#DIV/0!
	0.00_Ch	20	0.65_Ch	23	1212	1255	96.5737	0.869565
	0.00_Eu	10	0.70_Eu	10	1226	1246	98.3949	1

## Sheet: HC_G_Plot
	0.4	0.5	0.6	0.7	0.8	0.9
AS(0.00)_AS(0.90)	98.8131	99.1051	100	99.8619	99.6659	100
Ch(0.00)_Ch(0.65)	91.6201	90.0844	92.6544	94.751	94.9024	96.5737
Eu(0.00)_Eu(0.70)	91.7143	92.3404	93.1438	94.5799	96.518	98.3949

## Sheet: HC_L
	Unique Set A		Unique Set B		A ∩ B	A U B	% A ∩ B / A U B	Unique A / Unique B
0.4	0.00_AS	1	0.90_AS	0	203	204	99.5098	#DIV/0!
	0.00_Ch	14	0.65_Ch	9	196	219	89.4977	1.55556
	0.00_Eu	11	0.70_Eu	7	206	224	91.9643	1.57143
0.5	0.00_AS	1	0.90_AS	0	318	319	99.6865	#DIV/0!
	0.00_Ch	15	0.65_Ch	15	314	344	91.2791	1
	0.00_Eu	7	0.70_Eu	7	320	334	95.8084	1
0.6	0.00_AS	2	0.90_AS	2	446	450	99.1111	1
	0.00_Ch	18	0.65_Ch	19	436	473	92.1776	0.947368
	0.00_Eu	10	0.70_Eu	9	448	467	95.9315	1.11111
0.7	0.00_AS	1	0.90_AS	1	590	592	99.6622	1
	0.00_Ch	17	0.65_Ch	17	569	603	94.3615	1
	0.00_Eu	14	0.70_Eu	14	579	607	95.3871	1
0.8	0.00_AS	1	0.90_AS	0	771	772	99.8705	#DIV/0!
	0.00_Ch	27	0.65_Ch	28	745	800	93.125	0.964286
	0.00_Eu	20	0.70_Eu	20	766	806	95.0372	1
0.9	0.00_AS	1	0.90_AS	1	1103	1105	99.819	1
	0.00_Ch	24	0.65_Ch	32	1100	1156	95.1557	0.75
	0.00_Eu	15	0.70_Eu	13	1112	1140	97.5439	1.15385

## Sheet: HC_L_Plot
	0.4	0.5	0.6	0.7	0.8	0.9
AS(0.00)_AS(0.90)	99.5098	99.6865	99.1111	99.6622	99.8705	99.819
Ch(0.00)_Ch(0.65)	89.4977	91.2791	92.1776	94.3615	93.125	95.1557
Eu(0.00)_Eu(0.70)	91.9643	95.8084	95.9315	95.3871	95.0372	97.5439
