# Supplementary material for: Peptide Hemolytic Activity Analysis using Visual Data Mining of Similarity-based Complex Networks
Source: Preprints.org preprint supplement (doi:10.20944/preprints202303.0322.v1), 2023-03-17
Supplement: Supplementary file 7 [file SM4.3.3.1_Best-Cutoff.xlsx]

## Sheet: HB
	Unique Set A		Unique Set B		A ∩ B	A U B	% A ∩ B / A U B	Unique A / Unique B
0.4	AS(0.90)-G	157	AS(0.90)-L	17	182	356	51.1236	9.23529
	Ch(0.65)-G	152	Ch(0.65)-L	16	186	354	52.5424	9.5
	Eu(0.70)-G	167	Eu(0.70)-L	22	176	365	48.2192	7.59091
0.5	AS(0.90)-G	142	AS(0.90)-L	16	310	468	66.2393	8.875
	Ch(0.65)-G	146	Ch(0.65)-L	20	303	469	64.6055	7.3
	Eu(0.70)-G	147	Eu(0.70)-L	16	304	467	65.0964	9.1875
0.6	AS(0.90)-G	144	AS(0.90)-L	12	443	599	73.9566	12
	Ch(0.65)-G	146	Ch(0.65)-L	19	436	601	72.5458	7.68421
	Eu(0.70)-G	154	Eu(0.70)-L	14	430	598	71.9064	11
0.7	AS(0.90)-G	143	AS(0.90)-L	17	581	741	78.4076	8.41176
	Ch(0.65)-G	149	Ch(0.65)-L	14	582	745	78.1208	10.6429
	Eu(0.70)-G	151	Eu(0.70)-L	15	579	745	77.7181	10.0667
0.8	AS(0.90)-G	143	AS(0.90)-L	15	769	927	82.9558	9.53333
	Ch(0.65)-G	138	Ch(0.65)-L	15	762	915	83.2787	9.2
	Eu(0.70)-G	139	Eu(0.70)-L	18	765	922	82.9718	7.72222
0.9	AS(0.90)-G	116	AS(0.90)-L	9	1113	1238	89.9031	12.8889
	Ch(0.65)-G	116	Ch(0.65)-L	13	1116	1245	89.6386	8.92308
	Eu(0.70)-G	118	Eu(0.70)-L	10	1119	1247	89.7354	11.8

## Sheet: HB_Plot
	% A ∩ B / A U B
Metric/Alignment	0.4	0.5	0.6	0.7	0.8	0.9
AS(0.90)-G_AS(0.90)-L	51.1236	66.2393	73.9566	78.4076	82.9558	89.9031
Ch(0.65)-G_Ch(0.65)-L	52.5424	64.6055	72.5458	78.1208	83.2787	89.6386
Eu(0.70)-G_Eu(0.70)-L	48.2192	65.0964	71.9064	77.7181	82.9718	89.7354
								89.6083

## Sheet: HC
	Unique Set A		Unique Set B		A ∩ B	A U B	% A ∩ B / A U B	Unique A / Unique B
0.4	AS(0.90)-G	148	AS(0.90)-L	16	187	351	53.2764	9.25
	Ch(0.65)-G	154	Ch(0.65)-L	17	188	359	52.3677	9.05882
	Eu(0.70)-G	142	Eu(0.70)-L	20	193	355	54.3662	7.1
0.5	AS(0.90)-G	153	AS(0.90)-L	26	292	471	61.9958	5.88462
	Ch(0.65)-G	140	Ch(0.65)-L	19	310	469	66.0981	7.36842
	Eu(0.70)-G	147	Eu(0.70)-L	22	305	474	64.346	6.68182
0.6	AS(0.90)-G	148	AS(0.90)-L	15	433	596	72.651	9.86667
	Ch(0.65)-G	136	Ch(0.65)-L	16	439	591	74.2809	8.5
	Eu(0.70)-G	136	Eu(0.70)-L	15	442	593	74.5363	9.06667
0.7	AS(0.90)-G	149	AS(0.90)-L	16	575	740	77.7027	9.3125
	Ch(0.65)-G	150	Ch(0.65)-L	15	571	736	77.5815	10
	Eu(0.70)-G	140	Eu(0.70)-L	15	578	733	78.854	9.33333
0.8	AS(0.90)-G	143	AS(0.90)-L	17	754	914	82.4945	8.41176
	Ch(0.65)-G	144	Ch(0.65)-L	17	756	917	82.4427	8.47059
	Eu(0.70)-G	138	Eu(0.70)-L	21	765	924	82.7922	6.57143
0.9	AS(0.90)-G	128	AS(0.90)-L	14	1090	1232	88.474	9.14286
	Ch(0.65)-G	114	Ch(0.65)-L	11	1121	1246	89.9679	10.3636
	Eu(0.70)-G	123	Eu(0.70)-L	12	1113	1248	89.1827	10.25

## Sheet: HC_Plot
	% A ∩ B / A U B
Metric/Alignment	0.4	0.5	0.6	0.7	0.8	0.9
AS(0.90)-G_AS(0.90)-L	53.2764	61.9958	72.651	77.7027	82.4945	88.474
Ch(0.65)-G_Ch(0.65)-L	52.3677	66.0981	74.2809	77.5815	82.4427	89.9679
Eu(0.70)-G_Eu(0.70)-L	54.3662	64.346	74.5363	78.854	82.7922	89.1827
								89.6083
