# Supplementary material for: Peptide Hemolytic Activity Analysis using Visual Data Mining of Similarity-based Complex Networks
Source: Preprints.org preprint supplement (doi:10.20944/preprints202303.0322.v1), 2023-03-17
Supplement: Supplementary file 8 [file SM4.3.3.2_No-Cutoff.xlsx]

## Sheet: HB
	Unique Set A		Unique Set B		A ∩ B	A U B	% A ∩ B / A U B	Unique A / Unique B
0.4	AS-G	155	AS-L	18	172	345	49.8551	8.61111
	Ch-G	164	Ch-L	17	178	359	49.5822	9.64706
	Eu-G	165	Eu-L	16	179	360	49.7222	10.3125
0.5	AS-G	160	AS-L	17	287	464	61.8534	9.41176
	Ch-G	159	Ch-L	15	301	475	63.3684	10.6
	Eu-G	147	Eu-L	15	307	469	65.4584	9.8
0.6	AS-G	148	AS-L	19	438	605	72.3967	7.78947
	Ch-G	133	Ch-L	16	452	601	75.208	8.3125
	Eu-G	152	Eu-L	13	439	604	72.6821	11.6923
0.7	AS-G	148	AS-L	15	580	743	78.0619	9.86667
	Ch-G	144	Ch-L	13	588	745	78.9262	11.0769
	Eu-G	149	Eu-L	10	586	745	78.6577	14.9
0.8	AS-G	147	AS-L	20	762	929	82.0237	7.35
	Ch-G	131	Ch-L	15	772	918	84.0959	8.73333
	Eu-G	130	Eu-L	17	777	924	84.0909	7.64706
0.9	AS-G	122	AS-L	15	1109	1246	89.0048	8.13333
	Ch-G	115	Ch-L	12	1115	1242	89.7746	9.58333
	Eu-G	118	Eu-L	12	1121	1251	89.6083	9.83333

## Sheet: HB_Plot
	% A ∩ B / A U B
Metric/Alignment	0.4	0.5	0.6	0.7	0.8	0.9
AS-G_AS-L	49.8551	61.8534	72.3967	78.0619	82.0237	89.0048
Ch-G_Ch-L	49.5822	63.3684	75.208	78.9262	84.0959	89.7746
Eu-G_Eu-L	49.7222	65.4584	72.6821	78.6577	84.0909	89.6083
								89.6083

## Sheet: HC
	Unique Set A		Unique Set B		A ∩ B	A U B	% A ∩ B / A U B	Unique A / Unique B
0.4	AS-G	148	AS-L	17	187	352	53.125	8.70588
	Ch-G	152	Ch-L	19	191	362	52.7624	8
	Eu-G	140	Eu-L	21	196	357	54.902	6.66667
0.5	AS-G	153	AS-L	27	292	472	61.8644	5.66667
	Ch-G	143	Ch-L	21	308	472	65.2542	6.80952
	Eu-G	146	Eu-L	21	306	473	64.6934	6.95238
0.6	AS-G	147	AS-L	14	434	595	72.9412	10.5
	Ch-G	137	Ch-L	14	440	591	74.4501	9.78571
	Eu-G	134	Eu-L	15	443	592	74.8311	8.93333
0.7	AS-G	148	AS-L	16	575	739	77.8078	9.25
	Ch-G	154	Ch-L	14	572	740	77.2973	11
	Eu-G	140	Eu-L	15	578	733	78.854	9.33333
0.8	AS-G	143	AS-L	19	753	915	82.2951	7.52632
	Ch-G	143	Ch-L	18	754	915	82.4044	7.94444
	Eu-G	140	Eu-L	23	763	926	82.3974	6.08696
0.9	AS-G	128	AS-L	14	1090	1232	88.474	9.14286
	Ch-G	118	Ch-L	10	1114	1242	89.694	11.8
	Eu-G	120	Eu-L	11	1116	1247	89.4948	10.9091

## Sheet: HC_Plot
	% A ∩ B / A U B
Metric/Alignment	0.4	0.5	0.6	0.7	0.8	0.9
AS-G_AS-L	53.125	61.8644	72.9412	77.8078	82.2951	88.474
Ch-G_Ch-L	52.7624	65.2542	74.4501	77.2973	82.4044	89.694
Eu-G_Eu-L	54.902	64.6934	74.8311	78.854	82.3974	89.4948
								89.6083
