# Supplementary material for: Peptide Hemolytic Activity Analysis using Visual Data Mining of Similarity-based Complex Networks
Source: Preprints.org preprint supplement (doi:10.20944/preprints202303.0322.v1), 2023-03-17
Supplement: Supplementary file 9 [file SM4.3.4.1_Best-cutoff.xlsx]

## Sheet: G
	Unique Set A		Unique Set B		A ∩ B	A U B	% A ∩ B / A U B	Unique A / Unique B
0.4	AS_HB	78	AS_HC	74	261	413	63.1961	1.05405
	Ch_HB	51	Ch_HC	55	287	393	73.028	0.927273
	Eu_HB	76	Eu_HC	68	267	411	64.9635	1.11765
0.5	AS_HB	92	AS_HC	85	360	537	67.0391	1.08235
	Ch_HB	64	Ch_HC	65	385	514	74.9027	0.984615
	Eu_HB	84	Eu_HC	85	367	536	68.4701	0.988235
0.6	AS_HB	92	AS_HC	86	495	673	73.5513	1.06977
	Ch_HB	84	Ch_HC	77	498	659	75.569	1.09091
	Eu_HB	88	Eu_HC	82	496	666	74.4745	1.07317
0.7	AS_HB	91	AS_HC	91	633	815	77.6687	1
	Ch_HB	97	Ch_HC	87	634	818	77.5061	1.11494
	Eu_HB	99	Eu_HC	87	631	817	77.2338	1.13793
0.8	AS_HB	98	AS_HC	83	814	995	81.809	1.18072
	Ch_HB	80	Ch_HC	80	820	980	83.6735	1
	Eu_HB	77	Eu_HC	76	827	980	84.3878	1.01316
0.9	AS_HB	90	AS_HC	79	1139	1308	87.0795	1.13924
	Ch_HB	71	Ch_HC	74	1161	1306	88.8974	0.959459
	Eu_HB	58	Eu_HC	57	1179	1294	91.1128	1.01754

## Sheet: G_Plot
	0.4	0.5	0.6	0.7	0.8	0.9
AS-HB_AS-HC	63.1961	67.0391	73.5513	77.6687	81.809	87.0795
Ch-HB_Ch-HC	73.028	74.9027	75.569	77.5061	83.6735	88.8974
Eu-HB_Eu-HC	64.9635	68.4701	74.4745	77.2338	84.3878	91.1128

## Sheet: L
	Unique Set A		Unique Set B		A ∩ B	A U B	% A ∩ B / A U B	Unique A / Unique B
0.4	0.00_AS	51	0.90_AS	55	148	254	58.2677	0.927273
	0.00_Ch	51	0.65_Ch	54	151	256	58.9844	0.944444
	0.00_Eu	54	0.70_Eu	69	144	267	53.9326	0.782609
0.5	0.00_AS	71	0.90_AS	63	255	389	65.5527	1.12698
	0.00_Ch	58	0.65_Ch	64	265	387	68.4755	0.90625
	0.00_Eu	67	0.70_Eu	74	253	394	64.2132	0.905405
0.6	0.00_AS	88	0.90_AS	81	367	536	68.4701	1.08642
	0.00_Ch	62	0.65_Ch	62	393	517	76.0155	1
	0.00_Eu	81	0.70_Eu	94	363	538	67.4721	0.861702
0.7	0.00_AS	94	0.90_AS	87	504	685	73.5766	1.08046
	0.00_Ch	86	0.65_Ch	76	510	672	75.8929	1.13158
	0.00_Eu	95	0.70_Eu	94	499	688	72.5291	1.01064
0.8	0.00_AS	101	0.90_AS	88	683	872	78.3257	1.14773
	0.00_Ch	89	0.65_Ch	85	688	862	79.8144	1.04706
	0.00_Eu	82	0.70_Eu	85	701	868	80.7604	0.964706
0.9	0.00_AS	102	0.90_AS	84	1020	1206	84.5771	1.21429
	0.00_Ch	85	0.65_Ch	88	1044	1217	85.7847	0.965909
	0.00_Eu	79	0.70_Eu	75	1050	1204	87.2093	1.05333

## Sheet: L_Plot
	0.4	0.5	0.6	0.7	0.8	0.9
AS-HB_AS-HC	58.2677	65.5527	68.4701	73.5766	78.3257	84.5771
Ch-HB_Ch-HC	58.9844	68.4755	76.0155	75.8929	79.8144	85.7847
Eu-HB_Eu-HC	53.9326	64.2132	67.4721	72.5291	80.7604	87.2093
