# Supplementary material for: Peptide Hemolytic Activity Analysis using Visual Data Mining of Similarity-based Complex Networks
Source: Preprints.org preprint supplement (doi:10.20944/preprints202303.0322.v1), 2023-03-17
Supplement: Supplementary file 10 [file SM4.3.4.2_No-cutoff.xlsx]

## Sheet: G
	Unique Set A		Unique Set B		A ∩ B	A U B	% A ∩ B / A U B	Unique A / Unique B
0.4	AS-HB	90	AS-HC	98	237	425	55.7647	0.918367
	Ch-HB	81	Ch-HC	83	261	425	61.4118	0.975904
	Eu-HB	88	Eu-HC	80	256	424	60.3774	1.1
0.5	AS-HB	107	AS-HC	105	340	552	61.5942	1.01905
	Ch-HB	106	Ch-HC	97	354	557	63.5548	1.09278
	Eu-HB	113	Eu-HC	111	341	565	60.354	1.01802
0.6	AS-HB	122	AS-HC	117	464	703	66.0028	1.04274
	Ch-HB	111	Ch-HC	103	474	688	68.8953	1.07767
	Eu-HB	114	Eu-HC	100	477	691	69.0304	1.14
0.7	AS-HB	123	AS-HC	118	605	846	71.513	1.04237
	Ch-HB	117	Ch-HC	111	615	843	72.9537	1.05405
	Eu-HB	113	Eu-HC	96	622	831	74.8496	1.17708
0.8	AS-HB	121	AS-HC	108	788	1017	77.4828	1.12037
	Ch-HB	98	Ch-HC	92	805	995	80.9045	1.06522
	Eu-HB	88	Eu-HC	84	819	991	82.6438	1.04762
0.9	AS-HB	98	AS-HC	85	1133	1316	86.0942	1.15294
	Ch-HB	89	Ch-HC	91	1141	1321	86.374	0.978022
	Eu-HB	69	Eu-HC	66	1170	1305	89.6552	1.04545

## Sheet: G_Plot
	% A ∩ B / A U B
Metric/Alignment	0.4	0.5	0.6	0.7	0.8	0.9
AS-HB_AS-HC	55.7647	61.5942	66.0028	71.513	77.4828	86.0942
Ch-HB_Ch-HC	61.4118	63.5548	68.8953	72.9537	80.9045	86.374
Eu-HB_Eu-HC	60.3774	60.354	69.0304	74.8496	82.6438	89.6552
								89.6083

## Sheet: L
	Unique Set A		Unique Set B		A ∩ B	A U B	% A ∩ B / A U B	Unique A / Unique B
0.4	AS-HB	73	AS-HC	87	117	277	42.2383	0.83908
	Ch-HB	61	Ch-HC	76	134	271	49.4465	0.802632
	Eu-HB	58	Eu-HC	80	137	275	49.8182	0.725
0.5	AS-HB	103	AS-HC	118	201	422	47.6303	0.872881
	Ch-HB	78	Ch-HC	91	238	407	58.4767	0.857143
	Eu-HB	82	Eu-HC	87	240	409	58.6797	0.942529
0.6	AS-HB	129	AS-HC	120	328	577	56.8458	1.075
	Ch-HB	107	Ch-HC	93	361	561	64.3494	1.15054
	Eu-HB	99	Eu-HC	105	353	557	63.3752	0.942857
0.7	AS-HB	119	AS-HC	115	476	710	67.0423	1.03478
	Ch-HB	120	Ch-HC	105	481	706	68.1303	1.14286
	Eu-HB	113	Eu-HC	110	483	706	68.4136	1.02727
0.8	AS-HB	132	AS-HC	122	650	904	71.9027	1.08197
	Ch-HB	124	Ch-HC	109	663	896	73.9955	1.13761
	Eu-HB	106	Eu-HC	98	688	892	77.13	1.08163
0.9	AS-HB	119	AS-HC	99	1005	1223	82.175	1.20202
	Ch-HB	108	Ch-HC	105	1019	1232	82.711	1.02857
	Eu-HB	98	Eu-HC	92	1035	1225	84.4898	1.06522

## Sheet: L_Plot
	% A ∩ B / A U B
Metric/Alignment	0.4	0.5	0.6	0.7	0.8	0.9
AS-G_AS-L	42.2383	47.6303	56.8458	67.0423	71.9027	82.175
Ch-G_Ch-L	49.4465	58.4767	64.3494	68.1303	73.9955	82.711
Eu-G_Eu-L	49.8182	58.6797	63.3752	68.4136	77.13	84.4898
								89.6083
