# Supplementary material for: Peptide Hemolytic Activity Analysis using Visual Data Mining of Similarity-based Complex Networks
Source: Preprints.org preprint supplement (doi:10.20944/preprints202303.0322.v1), 2023-03-17
Supplement: Supplementary file 11 [file SM5.1.2_HSPNs-and-Reported-Motifs.xlsx]

## Sheet: HSPNs Motifs by Metric
N	Metric	Motif	Cluster	Cluster size	Matches in Positive Seqs.	Matches in Control Seqs.	Sites (%)	P-value	E-value	Score
1	0.00_Eucidean	LKGAGK	0	339	74	0	21.8	0.0043	0.047	1.3e-20
2	0.00_Eucidean	ERBADE	0	339	72	2	21.2	0.0065	0.071	6.4e-18
3	0.00_Eucidean	VCTRN	1	101	76	0	75.2	0.0042	0.038	3.2e-21
4	0.00_Eucidean	PGCTC	1	101	77	0	76.2	0.0083	0.075	8e-22
5	0.00_Eucidean	GETCVG	1	101	80	0	79.2	0.0083	0.075	9.9e-23
6	0.00_Eucidean	GLP	1	101	51	0	50.5	0.016	0.15	2.7e-14
7	0.00_Eucidean	SWP	1	101	45	0	44.6	0.016	0.15	1.8e-12
8	0.00_Eucidean	GTCNT	1	101	55	0	54.5	0.033	0.29	8.5e-16
9	0.00_Eucidean	LHTAKK	5	220	54	0	24.5	0.0019	0.011	3.1e-14
10	0.00_Eucidean	WKSFJK	5	220	45	0	20.5	0.015	0.092	1.9e-12
11	0.00_Eucidean	CYCRR	7	189	43	0	22.8	0.032	0.16	5.7e-12
12	0.00_Eucidean	LGKLLK	8	238	76	2	31.9	0.0024	0.0097	3.5e-18
13	0.00_Chebyshev	GILDTJ	1	304	72	0	23.7	0.01	0.073	2.1e-20
14	0.00_Chebyshev	KTAGK	1	304	72	0	23.7	0.02	0.014	1e-20
15	0.00_Chebyshev	FLGTIS	2	246	68	0	27.6	0.0088	0.079	3.8e-19
16	0.00_Chebyshev	MFTLK	2	246	57	0	23.2	0.034	0.31	2e-16
17	0.00_Chebyshev	EEEKRD	2	246	60	0	24.4	0.034	0.31	2.5e-17
18	0.00_Chebyshev	KSLLLL	2	246	56	0	22.8	0.034	0.31	4e-16
19	0.00_Chebyshev	LCEZER	2	246	55	0	22.4	0.034	0.31	8e-16
20	0.00_Chebyshev	VGGTCN	4	59	51	0	86.4	0.004	0.032	1.4e-22
21	0.00_Chebyshev	VCGETC	4	59	49	0	83.1	0.004	0.032	6.1e-21
22	0.00_Chebyshev	GLP	4	59	52	2	88.1	0.024	0.19	7.5e-22
23	0.00_Chebyshev	PVCT	4	59	51	2	86.4	0.024	0.19	5.6e-21
24	0.00_Chebyshev	CSW	4	59	44	0	74.6	0.024	0.19	5e-18
25	0.00_Chebyshev	LCYCRR	6	150	41	0	27.3	0.031	0.15	2.3e-11
26	0.00_Chebyshev	CVCV	6	150	41	1	27.3	0.031	0.15	4e-10
27	0.00_AngularSeparation	VLHTAL	0	223	80	0	35.9	0.0047	0.024	1.7e-22
28	0.00_AngularSeparation	WKSFLK	0	223	81	3	36.3	0.023	0.12	6.2e-20
29	0.00_AngularSeparation	ERBADE	1	140	62	0	44.3	0.0015	0.013	2.4e-16
30	0.00_AngularSeparation	MFTLK	1	140	57	0	40.7	0.0028	0.025	3.9e-15
31	0.00_AngularSeparation	LLLFFL	1	140	60	0	42.9	0.0028	0.025	4.9e-16
32	0.00_AngularSeparation	SLCEZ	1	140	61	0	43.6	0.0054	0.048	1.2e-16
33	0.00_AngularSeparation	EEEKRG	1	140	66	0	47.1	0.0054	0.048	3.8e-18
34	0.00_AngularSeparation	GTIS	1	140	71	0	50.7	0.01	0.092	6e-20
35	0.00_AngularSeparation	VLDTLK	2	296	65	0	22	0.013	0.063	2.6e-18
36	0.00_AngularSeparation	GLPV	3	61	45	0	73.8	0.017	0.14	1.7e-12
37	0.00_AngularSeparation	VCTRN	3	61	55	0	90.2	0.017	0.14	1.6e-15
38	0.00_AngularSeparation	CGETCV	3	61	56	0	91.8	0.017	0.14	8.2e-16
39	0.00_AngularSeparation	TPGCTC	3	61	54	0	88.5	0.017	0.14	3.3e-15
40	0.00_AngularSeparation	GGTCN	3	61	49	0	80.3	0.033	0.27	5.3e-14
41	0.00_AngularSeparation	JGKL	4	400	147	19	36.8	0.0056	0.022	1.3e-24
42	0.00_AngularSeparation	WKKI	5	255	88	10	34.5	0.025	0.12	8.8e-16

## Sheet: Motifs from_All_1647 StarPep
	Motif	Matches in Positive Seqs.	Matches in Control Seqs.	Sites (%)	P-value	E-value	Score
1	ISWIK	183	13	11.1	2.5e-07	4.5e-06	1.2e-33
2	FLGTI	232	14	14.1	1.5e-06	2.8e-05	1.4e-46
3	LLKKJ	158	16	9.6	3.4e-05	0.00061	1.3e-26
4	CKITKK	112	5	6.8	0.00099	0.018	1.1e-24
5	FLHSAK	46	0	2.8	0.002	0.036	8.5e-12
6	EEERRD	75	1	4.6	0.004	0.071	3.2e-19
7	GAVLKV	46	0	2.8	0.0079	0.14	2.2e-12
8	MFTLK	82	2	5	0.011	0.21	5.9e-22
9	RFCVC	44	0	2.7	0.016	0.28	4.3e-12
10	SLLLLF	47	0	2.9	0.016	0.28	5.4e-13
11	SLC	53	2	3.2	0.02	0.36	8.1e-13
12	GLP	80	7	4.9	0.031	0.57	1.2e-15
13	CNTPGC	66	0	4	0.032	0.57	5.7e-19
14	ALKAIS	35	0	2.1	0.032	0.57	1.1e-09
15	KTAGK	101	5	6.1	0.036	0.64	1.8e-23

## Sheet: HAPPENN_Motifs
Motif	Class
LKHI	Hemolytic
KIIKV	Hemolytic
TLLKK	Hemolytic
VNWK	Hemolytic
GAIA	Hemolytic
VNWKK	Hemolytic
KKILG	Hemolytic
VLKAA	Hemolytic
LWKT	Hemolytic
ALWKT	Hemolytic
MAL	Hemolytic
KITK	Hemolytic
PKIF	Hemolytic
GKEV	Hemolytic
KIAS	Hemolytic
CKITK	Hemolytic
KHILK	Hemolytic
IKVV	Hemolytic
IKVA	Hemolytic
IASI	Hemolytic

## Sheet: HemoPI_Motifs
Motif	Class	Dataset	Potency (HemoPI-2 Main only)		At least in 10 sequences
FKK	Hemolytic	HemoPI-1 Main	Na
LKL	Hemolytic	HemoPI-1 Main	Na
KKLL	Hemolytic	HemoPI-1 Main	Na
KWK	Hemolytic	HemoPI-1 Main	Na
VLK	Hemolytic	HemoPI-1 Main	Na
CYCR	Hemolytic	HemoPI-1 Main	Na
CRR	Hemolytic	HemoPI-1 Main	Na
RFC	Hemolytic	HemoPI-1 Main	Na
RRR	Hemolytic	HemoPI-1 Main	Na
LKKL	Hemolytic	HemoPI-1 Main	Na
ALW	Hemolytic	HemoPI-2 Main	High
GCS	Hemolytic	HemoPI-2 Main	High
AAAK	Hemolytic	HemoPI-2 Main	High
KLLS	Hemolytic	HemoPI-2 Main	High
LGKL	Hemolytic	HemoPI-2 Main	High
LLKKV	Hemolytic	HemoPI-2 Main	High
AKKAL	Hemolytic	HemoPI-2 Main	High
KVLKA	Hemolytic	HemoPI-2 Main	High
HIF	Hemolytic	HemoPI-2 Main	High
KKG	Hemolytic	HemoPI-2 Main	Low
QN	Hemolytic	HemoPI-2 Main	Low

## Sheet: All_91_Motifs
N0	Source	Motif
1	HSPNs	LKGAGK
2	HSPNs	ERBADE
3	HSPNs	VCTRN
4	HSPNs	PGCTC
5	HSPNs	GETCVG
6	HSPNs	GLP
7	HSPNs	SWP
8	HSPNs	GTCNT
9	HSPNs	LHTAKK
10	HSPNs	WKSFJK
11	HSPNs	CYCRR
12	HSPNs	LGKLLK
13	HSPNs	GILDTJ
14	HSPNs	KTAGK
15	HSPNs	FLGTIS
16	HSPNs	MFTLK
17	HSPNs	EEEKRD
18	HSPNs	KSLLLL
19	HSPNs	LCEZER
20	HSPNs	VGGTCN
21	HSPNs	VCGETC
22	HSPNs	PVCT
23	HSPNs	CSW
24	HSPNs	LCYCRR
25	HSPNs	CVCV
26	HSPNs	VLHTAL
27	HSPNs	WKSFLK
28	HSPNs	LLLFFL
29	HSPNs	SLCEZ
30	HSPNs	EEEKRG
31	HSPNs	GTIS
32	HSPNs	VLDTLK
33	HSPNs	GLPV
34	HSPNs	CGETCV
35	HSPNs	TPGCTC
36	HSPNs	GGTCN
37	HSPNs	JGKL
38	HSPNs	WKKI
39	HSPNs	ISWIK
40	HSPNs	FLGTI
41	HSPNs	LLKKJ
42	HSPNs	CKITKK
43	HSPNs	FLHSAK
44	HSPNs	EEERRD
45	HSPNs	GAVLKV
46	HSPNs	RFCVC
47	HSPNs	SLLLLF
48	HSPNs	SLC
49	HSPNs	CNTPGC
50	HSPNs	ALKAIS
51	HemoPI	FKK
52	HemoPI	LKL
53	HemoPI	KKLL
54	HemoPI	KWK
55	HemoPI	VLK
56	HemoPI	CYCR
57	HemoPI	CRR
58	HemoPI	RFC
59	HemoPI	RRR
60	HemoPI	LKKL
61	HemoPI	ALW
62	HemoPI	GCS
63	HemoPI	AAAK
64	HemoPI	KLLS
65	HemoPI	LGKL
66	HemoPI	LLKKV
67	HemoPI	AKKAL
68	HemoPI	KVLKA
69	HemoPI	HIF
70	HemoPI	KKG
71	HemoPI	QN
72	HAPPENN	LKHI
73	HAPPENN	KIIKV
74	HAPPENN	TLLKK
75	HAPPENN	VNWK
76	HAPPENN	GAIA
77	HAPPENN	VNWKK
78	HAPPENN	KKILG
79	HAPPENN	VLKAA
80	HAPPENN	LWKT
81	HAPPENN	ALWKT
82	HAPPENN	MAL
83	HAPPENN	KITK
84	HAPPENN	PKIF
85	HAPPENN	GKEV
86	HAPPENN	KIAS
87	HAPPENN	CKITK
88	HAPPENN	KHILK
89	HAPPENN	IKVV
90	HAPPENN	IKVA
91	HAPPENN	IASI

## Sheet: All_57_NR_Motifs
No.	Motif
1	K[GT]AGK
2	ERBADE
3	PGC
4	GLP
5	SWP
6	GTCN
7	WKSF[LI]K
8	[VI]LDT[LI]
9	MFTLK
10	LLL
11	VCGETC
12	VCT
13	CSW
14	CVCV
15	LHTA[KL]
16	LCEZ
17	EEEKRG
18	GTIS
19	GETCV
20	[LI]GKL
21	WKK
22	ISWIK
23	FLGTI
24	LLKK
25	FLHSAK
26	EEE[KR]RD
27	GAVLKV
28	SLC
29	ALKAIS
30	FKK
31	LKL
32	KLL
33	KWK
34	VLK
35	CYCR
36	CRR
37	RFC
38	RRR
39	LKKL
40	ALW
41	GCS
42	AAAK
43	LGKL
44	AKKAL
45	HIF
46	KKG
47	KHI
48	IKV
49	VNWK
50	GAIA
51	KKILG
52	LWKT
53	MAL
54	KITK
55	PKIF
56	GKEV
57	IAS
