# Supplementary material for: Peptide Hemolytic Activity Analysis using Visual Data Mining of Similarity-based Complex Networks
Source: Preprints.org preprint supplement (doi:10.20944/preprints202303.0322.v1), 2023-03-17
Supplement: Supplementary file 12 [file SM5.2_Motif-Enrichment_All-datatsets.xlsx]

## Sheet: Sorted-by-Rank-and-ER
	HemoPI-1			StarPepDB			Big-Hemo
Motif	ENR_RATIO	EVALUE	Rank	ENR_RATIO	EVALUE	RANK	ENR_RATIO	EVALUE	RANK		Rank	ER_sum
MFTLK	2.98	0.855	52	368	2.69e-67	12	2.25	6.45	47		FALSE	124.41
ALKAIS	3.66	1.92e-09	36	40.1	3.53e-21	35	3.32	8.48e-12	9		TRUE	15.6933
GTCN	10.9	0.0544	50	6.43	2.28e-19	39	26	1.69e-06	20		FALSE	14.4433
WKSFJK	19.2	2.8e-40	2	5.06	3.55e-158	1	4.94	6.01e-22	3		TRUE	9.73333
VCGETC	12.9	0.0134	49	9.38	1.54e-21	34	4.14	2.92e-06	21		FALSE	8.80667
WKK	19	3.02e-44	1	2.45	1.32e-97	5	1.38	1.11	42		FALSE	7.61
AKKAL	16.1	7.19e-29	11	3.33	6.66e-101	4	1.55	0.00063	24		TRUE	6.99333
GETCV	4.66	1.11e-05	44	6.45	2.14e-17	41	9.71	1.12e-12	6		FALSE	6.94
CYCR	10.9	5.47e-13	26	5.91	2.55e-17	42	1.4	0.71	41		FALSE	6.07
LKKL	12.6	1.44e-31	4	3.62	2.65e-130	2	1.68	1.37e-08	12		TRUE	5.96667
CVCV	14.5	1.52e-09	34	1.35	0.296	51	1.15	7.74	48		FALSE	5.66667
ISWIK	7.86	5.69e-19	19	6.19	3.45e-59	15	2.51	4.45e-05	22		TRUE	5.52
RFC	3.64	5.81e-14	24	10.8	9.36e-22	32	1.6	0.287	39		FALSE	5.34667
LHTA[KL]	3.94	1.9e-13	25	8.25	4.73e-27	29	3.74	1.76e-11	10		TRUE	5.31
FLHSAK	7.04	1.82e-11	29	5.69	2.1e-45	21	1.95	0.00114	26		TRUE	4.89333
CSW	5.39	5.97e-29	10	6.41	1.03e-17	40	2.26	0.00111	25		FALSE	4.68667
LWKT	7.25	4.6e-31	6	2.35	5.59e-55	18	3.5	2.59e-10	11		TRUE	4.36667
FLGTI	6.94	1.41e-14	22	2.15	1.18e-21	33	3.88	5.7e-24	2		TRUE	4.32333
GAVLKV	4.72	2.03e-12	27	2.7	1.27e-19	38	5.3	5.11e-07	18		FALSE	4.24
PGC	2.78	4.84e-07	40	2.79	1.5e-07	47	6.4	9.85e-05	23		FALSE	3.99
KKILG	6.71	1.61e-26	13	3.29	3.56e-77	11	1.85	1.36e-07	13		TRUE	3.95
KITK	6.99	5.48e-26	15	2.48	1.22e-57	16	2.05	0.168	36		TRUE	3.84
KHI	2.79	1.67e-09	35	1.69	1.19e-20	37	6.57	3.96e-14	5		FALSE	3.68333
LGKL	5.47	1.14e-29	7	2.17	5.13e-87	8	3.34	5.48e-12	8		TRUE	3.66
KWK	4.84	2.02e-31	5	3.97	1.22e-55	17	1.98	1.79e-07	15		TRUE	3.59667
VNWK	5.41	3.49e-08	38	3.27	2.63e-29	28	2	0.0206	33		FALSE	3.56
KGAGK	5.13	2.35e-27	12	2.66	2.25e-43	22	2.81	2.43e-14	4		TRUE	3.53333
VCT	3.25	2.9e-11	30	6.03	7.36e-17	43	1.27	4.61	45		FALSE	3.51667
ALW	2.18	0.000174	47	2.03	1.85e-15	44	6.25	2.11e-07	16		FALSE	3.48667
SWP	4.56	5.42e-26	14	3.76	7.67e-35	26	1.98	0.00544	28		TRUE	3.43333
HIF	2.18	5.15e-05	45	6.32	6.51e-06	49	1.34	0.192	37		FALSE	3.28
LLKK	4.31	1.88e-34	3	3.82	1.35e-126	3	1.6	0.118	35		TRUE	3.24333
[VI]LDTJ	3.02	4.39e-10	33	2.15	1.05e-40	23	4.27	1.58e-24	1		TRUE	3.14667
CRR	5.08	1e-10	32	2.41	3.92e-06	48	1.76	0.0164	30		FALSE	3.08333
KLL	5.3	3.06e-25	16	2.2	6.18e-83	10	1.22	0.356	40		FALSE	2.90667
JGKL	4.07	1.38e-29	8	2.32	8.01e-90	7	1.71	2.12e-07	17		TRUE	2.7
FKK	3.81	4.88e-29	9	2.64	5.79e-83	9	1.08	5.24	46		FALSE	2.51
GAIA	2.22	2.94e-07	39	2.5	4.47e-49	19	2.3	0.0183	32		FALSE	2.34
VLK	3	8.34e-17	20	2.06	9.64e-64	14	1.88	1.52e-07	14		TRUE	2.31333
GLP	2.09	5.45e-05	46	2.46	3.05e-35	25	2.26	3.87e-12	7		FALSE	2.27
PKIF	2.89	1.05e-14	21	2.19	3.22e-46	20	1.47	0.00479	27		TRUE	2.18333
GKEV	1.65	0.00132		1.68	3.41e-25		3.08	0.00983			#REF!	2.13667
GTIS	2.93	7.07e-09		1.78	6.83e-25		1.22	1.65			#REF!	1.97667
AAAK	2.34	8.17e-11		2.29	1.4e-30		1.17	2.47			#REF!	1.93333
GCS	2.44	1.11e-06		1.46	1.35		1.82	0.0762			#REF!	1.90667
IAS	1.34	2.42		1.56	7.9e-11		2.46	6.41e-07			#REF!	1.78667
MAL	1.24	4.57		1.68	5.01e-21		1.27	0.0166			#REF!	1.39667

## Sheet: Motifs-in-al-Datasets
	HemoPI-1			StarPepDB			Big-Hemo
CONSENSUS	RANK	ENR_RATIO	EVALUE	RANK	ENR_RATIO	EVALUE	RANK	ENR_RATIO	EVALUE	ER_Av
MFTLK	52	2.98	0.855	12	368	2.69e-67	47	2.25	6.45	124.41
ALKAIS	36	3.66	1.92e-09	35	40.1	3.53e-21	9	3.32	8.48e-12	15.6933
GTCN	50	10.9	0.0544	39	6.43	2.28e-19	20	26	1.69e-06	14.4433
WKSFJK	2	19.2	2.8e-40	1	5.06	3.55e-158	3	4.94	6.01e-22	9.73333
VCGETC	49	12.9	0.0134	34	9.38	1.54e-21	21	4.14	2.92e-06	8.80667
WKK	1	19	3.02e-44	5	2.45	1.32e-97	42	1.38	1.11	7.61
AKKAL	11	16.1	7.19e-29	4	3.33	6.66e-101	24	1.55	0.00063	6.99333
GETCV	44	4.66	1.11e-05	41	6.45	2.14e-17	6	9.71	1.12e-12	6.94
CYCR	26	10.9	5.47e-13	42	5.91	2.55e-17	41	1.4	0.71	6.07
LKKL	4	12.6	1.44e-31	2	3.62	2.65e-130	12	1.68	1.37e-08	5.96667
CVCV	34	14.5	1.52e-09	51	1.35	0.296	48	1.15	7.74	5.66667
ISWIK	19	7.86	5.69e-19	15	6.19	3.45e-59	22	2.51	4.45e-05	5.52
RFC	24	3.64	5.81e-14	32	10.8	9.36e-22	39	1.6	0.287	5.34667
LHTA[KL]	25	3.94	1.9e-13	29	8.25	4.73e-27	10	3.74	1.76e-11	5.31
FLHSAK	29	7.04	1.82e-11	21	5.69	2.1e-45	26	1.95	0.00114	4.89333
CSW	10	5.39	5.97e-29	40	6.41	1.03e-17	25	2.26	0.00111	4.68667
LWKT	6	7.25	4.6e-31	18	2.35	5.59e-55	11	3.5	2.59e-10	4.36667
FLGTI	22	6.94	1.41e-14	33	2.15	1.18e-21	2	3.88	5.7e-24	4.32333
GAVLKV	27	4.72	2.03e-12	38	2.7	1.27e-19	18	5.3	5.11e-07	4.24
PGC	40	2.78	4.84e-07	47	2.79	1.5e-07	23	6.4	9.85e-05	3.99
KKILG	13	6.71	1.61e-26	11	3.29	3.56e-77	13	1.85	1.36e-07	3.95
KITK	15	6.99	5.48e-26	16	2.48	1.22e-57	36	2.05	0.168	3.84
KHI	35	2.79	1.67e-09	37	1.69	1.19e-20	5	6.57	3.96e-14	3.68333
LGKL	7	5.47	1.14e-29	8	2.17	5.13e-87	8	3.34	5.48e-12	3.66
KWK	5	4.84	2.02e-31	17	3.97	1.22e-55	15	1.98	1.79e-07	3.59667
VNWK	38	5.41	3.49e-08	28	3.27	2.63e-29	33	2	0.0206	3.56
K[GT]AGK	12	5.13	2.35e-27	22	2.66	2.25e-43	4	2.81	2.43e-14	3.53333
VCT	30	3.25	2.9e-11	43	6.03	7.36e-17	45	1.27	4.61	3.51667
ALW	47	2.18	0.000174	44	2.03	1.85e-15	16	6.25	2.11e-07	3.48667
SWP	14	4.56	5.42e-26	26	3.76	7.67e-35	28	1.98	0.00544	3.43333
HIF	45	2.18	5.15e-05	49	6.32	6.51e-06	37	1.34	0.192	3.28
LLKK	3	4.31	1.88e-34	3	3.82	1.35e-126	35	1.6	0.118	3.24333
[VI]LDTJ	33	3.02	4.39e-10	23	2.15	1.05e-40	1	4.27	1.58e-24	3.14667
CRR	32	5.08	1e-10	48	2.41	3.92e-06	30	1.76	0.0164	3.08333
KLL	16	5.3	3.06e-25	10	2.2	6.18e-83	40	1.22	0.356	2.90667
JGKL	8	4.07	1.38e-29	7	2.32	8.01e-90	17	1.71	2.12e-07	2.7
FKK	9	3.81	4.88e-29	9	2.64	5.79e-83	46	1.08	5.24	2.51
GAIA	39	2.22	2.94e-07	19	2.5	4.47e-49	32	2.3	0.0183	2.34
VLK	20	3	8.34e-17	14	2.06	9.64e-64	14	1.88	1.52e-07	2.31333
GLP	46	2.09	5.45e-05	25	2.46	3.05e-35	7	2.26	3.87e-12	2.27
PKIF	21	2.89	1.05e-14	20	2.19	3.22e-46	27	1.47	0.00479	2.18333
GKEV	48	1.65	0.00132	30	1.68	3.41e-25	29	3.08	0.00983	2.13667
GTIS	37	2.93	7.07e-09	31	1.78	6.83e-25	43	1.22	1.65	1.97667
AAAK	31	2.34	8.17e-11	27	2.29	1.4e-30	44	1.17	2.47	1.93333
GCS	41	2.44	1.11e-06	52	1.46	1.35	34	1.82	0.0762	1.90667
IAS	53	1.34	2.42	45	1.56	7.9e-11	19	2.46	6.41e-07	1.78667
MAL	54	1.24	4.57	36	1.68	5.01e-21	31	1.27	0.0166	1.39667

## Sheet: Motif_Results
HemoPI-1				StarPepDB				Big-Hemo
RANK	CONSENSUS	ENR_RATIO	EVALUE	RANK	CONSENSUS	ENR_RATIO	EVALUE	RANK	CONSENSUS	ENR_RATIO	EVALUE		Presenr in all Datasets
31	AAAK	2.34	8.17e-11	27	AAAK	2.29	1.4e-30	44	AAAK	1.17	2.47		TRUE
11	AKKAL	16.1	7.19e-29	4	AKKAL	3.33	6.66e-101	24	AKKAL	1.55	0.00063		TRUE
36	ALKAIS	3.66	1.92e-09	35	ALKAIS	40.1	3.53e-21	9	ALKAIS	3.32	8.48e-12		TRUE
47	ALW	2.18	0.000174	44	ALW	2.03	1.85e-15	16	ALW	6.25	2.11e-07		TRUE
32	CRR	5.08	1e-10	48	CRR	2.41	3.92e-06	30	CRR	1.76	0.0164		TRUE
10	CSW	5.39	5.97e-29	40	CSW	6.41	1.03e-17	25	CSW	2.26	0.00111		TRUE
34	CVCV	14.5	1.52e-09	51	CVCV	1.35	0.296	48	CVCV	1.15	7.74		TRUE
26	CYCR	10.9	5.47e-13	42	CYCR	5.91	2.55e-17	41	CYCR	1.4	0.71		TRUE
				53	EEEKRD	1.35	7.01						FALSE
9	FKK	3.81	4.88e-29	9	FKK	2.64	5.79e-83	46	FKK	1.08	5.24		TRUE
22	FLGTI	6.94	1.41e-14	33	FLGTI	2.15	1.18e-21	2	FLGTI	3.88	5.7e-24		TRUE
29	FLHSAK	7.04	1.82e-11	21	FLHSAK	5.69	2.1e-45	26	FLHSAK	1.95	0.00114		TRUE
39	GAIA	2.22	2.94e-07	19	GAIA	2.5	4.47e-49	32	GAIA	2.3	0.0183		TRUE
27	GAVLKV	4.72	2.03e-12	38	GAVLKV	2.7	1.27e-19	18	GAVLKV	5.3	5.11e-07		TRUE
41	GCS	2.44	1.11e-06	52	GCS	1.46	1.35	34	GCS	1.82	0.0762		TRUE
44	GETCV	4.66	1.11e-05	41	GETCV	6.45	2.14e-17	6	GETCV	9.71	1.12e-12		TRUE
48	GKEV	1.65	0.00132	30	GKEV	1.68	3.41e-25	29	GKEV	3.08	0.00983		TRUE
46	GLP	2.09	5.45e-05	25	GLP	2.46	3.05e-35	7	GLP	2.26	3.87e-12		TRUE
50	GTCN	10.9	0.0544	39	GTCN	6.43	2.28e-19	20	GTCN	26	1.69e-06		TRUE
37	GTIS	2.93	7.07e-09	31	GTIS	1.78	6.83e-25	43	GTIS	1.22	1.65		TRUE
45	HIF	2.18	5.15e-05	49	HIF	6.32	6.51e-06	37	HIF	1.34	0.192		TRUE
53	IAS	1.34	2.42	45	IAS	1.56	7.9e-11	19	IAS	2.46	6.41e-07		TRUE
42	IKV	1.97	1.55e-06	46	IKV	1.57	6.65e-10						FALSE
33	[VI]LDTJ	3.02	4.39e-10	23	[VI]LDTJ	2.15	1.05e-40	1	[VI]LDTJ	4.27	1.58e-24		TRUE
19	ISWIK	7.86	5.69e-19	15	ISWIK	6.19	3.45e-59	22	ISWIK	2.51	4.45e-05		TRUE
8	JGKL	4.07	1.38e-29	7	JGKL	2.32	8.01e-90	17	JGKL	1.71	2.12e-07		TRUE
12	K[GT]AGK	5.13	2.35e-27	22	K[GT]AGK	2.66	2.25e-43	4	K[GT]AGK	2.81	2.43e-14		TRUE
35	KHI	2.79	1.67e-09	37	KHI	1.69	1.19e-20	5	KHI	6.57	3.96e-14		TRUE
15	KITK	6.99	5.48e-26	16	KITK	2.48	1.22e-57	36	KITK	2.05	0.168		TRUE
17	KKG	3.73	9.15e-24	13	KKG	2.05	1.19e-64						FALSE
13	KKILG	6.71	1.61e-26	11	KKILG	3.29	3.56e-77	13	KKILG	1.85	1.36e-07		TRUE
16	KLL	5.3	3.06e-25	10	KLL	2.2	6.18e-83	40	KLL	1.22	0.356		TRUE
5	KWK	4.84	2.02e-31	17	KWK	3.97	1.22e-55	15	KWK	1.98	1.79e-07		TRUE
51	LCEZ	2.04	0.344					38	LCEZ	1.46	0.247		FALSE
7	LGKL	5.47	1.14e-29	8	LGKL	2.17	5.13e-87	8	LGKL	3.34	5.48e-12		TRUE
25	LHTA[KL]	3.94	1.9e-13	29	LHTA[KL]	8.25	4.73e-27	10	LHTA[KL]	3.74	1.76e-11		TRUE
4	LKKL	12.6	1.44e-31	2	LKKL	3.62	2.65e-130	12	LKKL	1.68	1.37e-08		TRUE
18	LKL	3.6	9.64e-22	6	LKL	3.79	4.27e-97						FALSE
3	LLKK	4.31	1.88e-34	3	LLKK	3.82	1.35e-126	35	LLKK	1.6	0.118		TRUE
23	LLL	4.5	4.69e-14	24	LLL	2.36	7.49e-40						FALSE
6	LWKT	7.25	4.6e-31	18	LWKT	2.35	5.59e-55	11	LWKT	3.5	2.59e-10		TRUE
54	MAL	1.24	4.57	36	MAL	1.68	5.01e-21	31	MAL	1.27	0.0166		TRUE
52	MFTLK	2.98	0.855	12	MFTLK	368	2.69e-67	47	MFTLK	2.25	6.45		TRUE
40	PGC	2.78	4.84e-07	47	PGC	2.79	1.5e-07	23	PGC	6.4	9.85e-05		TRUE
21	PKIF	2.89	1.05e-14	20	PKIF	2.19	3.22e-46	27	PKIF	1.47	0.00479		TRUE
24	RFC	3.64	5.81e-14	32	RFC	10.8	9.36e-22	39	RFC	1.6	0.287		TRUE
28	RRR	5.88	5.16e-12	50	RRR	1.81	0.00306						FALSE
43	SLC	2.06	1.05e-05										FALSE
14	SWP	4.56	5.42e-26	26	SWP	3.76	7.67e-35	28	SWP	1.98	0.00544		TRUE
49	VCGETC	12.9	0.0134	34	VCGETC	9.38	1.54e-21	21	VCGETC	4.14	2.92e-06		TRUE
30	VCT	3.25	2.9e-11	43	VCT	6.03	7.36e-17	45	VCT	1.27	4.61		TRUE
20	VLK	3	8.34e-17	14	VLK	2.06	9.64e-64	14	VLK	1.88	1.52e-07		TRUE
38	VNWK	5.41	3.49e-08	28	VNWK	3.27	2.63e-29	33	VNWK	2	0.0206		TRUE
1	WKK	19	3.02e-44	5	WKK	2.45	1.32e-97	42	WKK	1.38	1.11		TRUE
2	WKSFJK	19.2	2.8e-40	1	WKSFJK	5.06	3.55e-158	3	WKSFJK	4.94	6.01e-22		TRUE

## Sheet: HemoPI-1
RANK	ID	CONSENSUS	TP	TP%	FP	FP%	ENR_RATIO	SCORE_THR	PVALUE	LOG_PVALUE	EVALUE	LOG_EVALUE	QVALUE	LOG_QVALUE
1	Motif_21	WKK	191	38.59	9	1.83	19	5	5.3e-46	-104.25	3.02e-44	-100.21	3.02e-44	-100.21
2	Motif_7	WKSFJK	173	34.95	8	1.63	19.2	0.98	4.92e-42	-95.12	2.8e-40	-91.07	1.4e-40	-91.77
3	Motif_24	LLKK	299	60.4	68	13.85	4.31	0.17	3.3e-36	-81.7	1.88e-34	-77.66	6.27e-35	-78.75
4	Motif_39	LKKL	152	30.71	11	2.24	12.6	6.6	2.52e-33	-75.06	1.44e-31	-71.02	3.59e-32	-72.4
5	Motif_33	KWK	248	50.1	50	10.18	4.84	0.12	3.54e-33	-74.72	2.02e-31	-70.68	4.04e-32	-72.29
6	Motif_52	LWKT	189	38.18	25	5.09	7.25	1.6	8.07e-33	-73.9	4.6e-31	-69.85	7.67e-32	-71.65
7	Motif_43	LGKL	214	43.23	38	7.74	5.47	1.4	2e-31	-70.69	1.14e-29	-66.65	1.63e-30	-68.59
8	Motif_20	JGKL	270	54.55	65	13.24	4.07	0.47	2.42e-31	-70.5	1.38e-29	-66.45	1.72e-30	-68.53
9	Motif_30	FKK	283	57.17	73	14.87	3.81	0.058	8.56e-31	-69.23	4.88e-29	-65.19	5.42e-30	-67.39
10	Motif_13	CSW	211	42.63	38	7.74	5.39	0.15	1.05e-30	-69.03	5.97e-29	-64.99	5.97e-30	-67.29
11	Motif_44	AKKAL	129	26.06	7	1.43	16.1	4.4	1.26e-30	-68.84	7.19e-29	-64.8	6.54e-30	-67.2
12	Motif_1	K[GT]AGK	206	41.62	39	7.94	5.13	0.22	4.13e-29	-65.36	2.35e-27	-61.31	1.96e-28	-63.8
13	Motif_51	KKILG	168	33.94	24	4.89	6.71	1.1	2.82e-28	-63.44	1.61e-26	-59.39	1.23e-27	-61.96
14	Motif_5	SWP	215	43.43	46	9.37	4.56	0.1	9.5e-28	-62.22	5.42e-26	-58.18	3.65e-27	-60.87
15	Motif_54	KITK	161	32.53	22	4.48	6.99	2.1	9.61e-28	-62.21	5.48e-26	-58.17	3.65e-27	-60.87
16	Motif_32	KLL	186	37.58	34	6.92	5.3	3.7	5.36e-27	-60.49	3.06e-25	-56.45	1.91e-26	-59.22
17	Motif_46	KKG	236	47.68	62	12.63	3.73	3.7	1.6e-25	-57.09	9.15e-24	-53.05	5.38e-25	-55.88
18	Motif_31	LKL	224	45.25	61	12.42	3.6	3.4	1.69e-23	-52.43	9.64e-22	-48.39	5.36e-23	-51.28
19	Motif_22	ISWIK	110	22.22	13	2.65	7.86	0.2	9.98e-21	-46.05	5.69e-19	-42.01	2.99e-20	-44.96
20	Motif_34	VLK	214	43.23	70	14.26	3	3.6	1.46e-18	-41.07	8.34e-17	-37.02	4.17e-18	-40.02
21	Motif_55	PKIF	197	39.8	67	13.65	2.89	0.71	1.85e-16	-36.23	1.05e-14	-32.18	5.02e-16	-35.23
22	Motif_23	FLGTI	90	18.18	12	2.44	6.94	1.1	2.47e-16	-35.94	1.41e-14	-31.9	6.39e-16	-34.99
23	Motif_10	LLL	117	23.64	25	5.09	4.5	4.5	8.23e-16	-34.73	4.69e-14	-30.69	2.04e-15	-33.83
24	Motif_37	RFC	142	28.69	38	7.74	3.64	0.19	1.02e-15	-34.52	5.81e-14	-30.48	2.42e-15	-33.65
25	Motif_15	LHTA[KL]	126	25.45	31	6.31	3.94	0.015	3.33e-15	-33.34	1.9e-13	-29.29	7.59e-15	-32.51
26	Motif_35	CYCR	65	13.13	5	1.02	10.9	4.2	9.6e-15	-32.28	5.47e-13	-28.23	2.1e-14	-31.49
27	Motif_27	GAVLKV	99	20	20	4.07	4.72	0.057	3.56e-14	-30.97	2.03e-12	-26.92	7.53e-14	-30.22
28	Motif_38	RRR	82	16.57	13	2.65	5.88	5.4	9.05e-14	-30.03	5.16e-12	-25.99	1.84e-13	-29.32
29	Motif_25	FLHSAK	70	14.14	9	1.83	7.04	0.8	3.19e-13	-28.77	1.82e-11	-24.73	6.28e-13	-28.1
30	Motif_12	VCT	130	26.26	39	7.94	3.25	0.053	5.08e-13	-28.31	2.9e-11	-24.26	9.66e-13	-27.67
31	Motif_42	AAAK	202	40.81	85	17.31	2.34	0.11	1.43e-12	-27.27	8.17e-11	-23.23	2.64e-12	-26.66
32	Motif_36	CRR	81	16.36	15	3.05	5.08	4.8	1.76e-12	-27.07	1e-10	-23.02	3.13e-12	-26.49
33	Motif_8	[VI]LDTJ	127	25.66	41	8.35	3.02	1.5	7.69e-12	-25.59	4.39e-10	-21.55	1.33e-11	-25.04
34	Motif_14	CVCV	43	8.69	2	0.41	14.5	6.3	2.67e-11	-24.35	1.52e-09	-20.3	4.48e-11	-23.83
35	Motif_47	KHI	134	27.07	47	9.57	2.79	3.6	2.93e-11	-24.25	1.67e-09	-20.21	4.77e-11	-23.77
36	Motif_29	ALKAIS	95	19.19	25	5.09	3.66	0.35	3.36e-11	-24.12	1.92e-09	-20.07	5.33e-11	-23.66
37	Motif_18	GTIS	117	23.64	39	7.94	2.93	1.4	1.24e-10	-22.81	7.07e-09	-18.77	1.91e-10	-22.38
38	Motif_49	VNWK	59	11.92	10	2.04	5.41	3.6	6.12e-10	-21.21	3.49e-08	-17.17	9.18e-10	-20.81
39	Motif_50	GAIA	151	30.51	67	13.65	2.22	0.81	5.15e-09	-19.08	2.94e-07	-15.04	7.53e-09	-18.7
40	Motif_3	PGC	100	20.2	35	7.13	2.78	0.91	8.49e-09	-18.58	4.84e-07	-14.54	1.21e-08	-18.23
41	Motif_41	GCS	117	23.64	47	9.57	2.44	0.45	1.95e-08	-17.76	1.11e-06	-13.71	2.7e-08	-17.43
42	Motif_48	IKV	176	35.56	88	17.92	1.97	0.55	2.73e-08	-17.42	1.55e-06	-13.37	3.7e-08	-17.11
43	Motif_28	SLC	140	28.28	67	13.65	2.06	0.19	1.85e-07	-15.5	1.05e-05	-11.46	2.45e-07	-15.22
44	Motif_19	GETCV	46	9.29	9	1.83	4.66	1.5	1.95e-07	-15.45	1.11e-05	-11.4	2.53e-07	-15.19
45	Motif_45	HIF	109	22.02	49	9.98	2.18	0.058	9.03e-07	-13.92	5.15e-05	-9.87	1.14e-06	-13.68
46	Motif_4	GLP	119	24.04	56	11.41	2.09	4.1	9.57e-07	-13.86	5.45e-05	-9.82	1.19e-06	-13.65
47	Motif_40	ALW	98	19.8	44	8.96	2.18	3.2	3.04e-06	-12.7	0.000174	-8.66	3.69e-06	-12.51
48	Motif_56	GKEV	164	33.13	98	19.96	1.65	0.083	2.31e-05	-10.67	0.00132	-6.63	2.75e-05	-10.5
49	Motif_11	VCGETC	12	2.42	0	0	12.9	11	0.000235	-8.36	0.0134	-4.31	0.000273	-8.21
50	Motif_6	GTCN	10	2.02	0	0	10.9	18	0.000954	-6.96	0.0544	-2.91	0.00109	-6.82
51	Motif_16	LCEZ	36	7.27	17	3.46	2.04	2.8	0.00603	-5.11	0.344	-1.07	0.00674	-5
52	Motif_9	MFTLK	14	2.83	4	0.81	2.98	4.3	0.015	-4.2	0.855	-0.16	0.0164	-4.11
53	Motif_57	IAS	80	16.16	59	12.02	1.34	3.7	0.0425	-3.16	2.42	0.89	0.0457	-3.09
54	Motif_53	MAL	95	19.19	76	15.48	1.24	2.5	0.0802	-2.52	4.57	1.52	0.0847	-2.47

## Sheet: StarPep
RANK	ID	CONSENSUS	TP	TP%	FP	FP%	ENR_RATIO	SCORE_THR	PVALUE	LOG_PVALUE	EVALUE	LOG_EVALUE	QVALUE	LOG_QVALUE
1	Motif_7	WKSFJK	487	27.53	1934	5.45	5.06	0.42	6.24e-160	-366.58	3.55e-158	-362.54	3.55e-158	-362.54
2	Motif_39	LKKL	576	32.56	3197	9	3.62	1.2	4.65e-132	-302.41	2.65e-130	-298.36	1.32e-130	-299.06
3	Motif_24	LLKK	524	29.62	2756	7.76	3.82	1.2	2.37e-128	-293.87	1.35e-126	-289.83	4.5e-127	-290.92
4	Motif_44	AKKAL	497	28.09	2999	8.45	3.33	3.4	1.17e-102	-234.71	6.66e-101	-230.67	1.66e-101	-232.05
5	Motif_21	WKK	790	44.66	6488	18.27	2.45	3	2.32e-99	-227.11	1.32e-97	-223.07	2.65e-98	-224.68
6	Motif_31	LKL	406	22.95	2155	6.07	3.79	4	7.49e-99	-225.94	4.27e-97	-221.9	7.12e-98	-223.69
7	Motif_20	JGKL	810	45.79	7024	19.78	2.32	0.18	1.41e-91	-209.19	8.01e-90	-205.15	1.14e-90	-207.1
8	Motif_43	LGKL	902	50.99	8343	23.5	2.17	0.21	9e-89	-202.73	5.13e-87	-198.69	6.41e-88	-200.77
9	Motif_30	FKK	585	33.07	4458	12.56	2.64	3.9	1.02e-84	-193.4	5.79e-83	-189.36	6.18e-84	-191.6
10	Motif_32	KLL	834	47.15	7611	21.44	2.2	3.1	1.08e-84	-193.34	6.18e-83	-189.29	6.18e-84	-191.6
11	Motif_51	KKILG	386	21.82	2357	6.64	3.29	3.5	6.24e-79	-180.07	3.56e-77	-176.03	3.23e-78	-178.43
12	Motif_9	MFTLK	54	3.05	2	0.01	368	14	4.72e-69	-157.33	2.69e-67	-153.28	2.24e-68	-155.77
13	Motif_46	KKG	769	43.47	7543	21.24	2.05	3	2.08e-66	-151.24	1.19e-64	-147.19	9.14e-66	-149.76
14	Motif_34	VLK	748	42.28	7297	20.55	2.06	3.4	1.69e-65	-149.14	9.64e-64	-145.1	6.89e-65	-147.74
15	Motif_22	ISWIK	153	8.65	498	1.4	6.19	4.9	6.05e-61	-138.66	3.45e-59	-134.62	2.3e-60	-137.32
16	Motif_54	KITK	455	25.72	3692	10.4	2.48	1.1	2.15e-59	-135.09	1.22e-57	-131.05	7.65e-59	-133.82
17	Motif_33	KWK	220	12.44	1115	3.14	3.97	5.4	2.14e-57	-130.49	1.22e-55	-126.44	7.17e-57	-129.28
18	Motif_52	LWKT	480	27.13	4101	11.55	2.35	1	9.81e-57	-128.96	5.59e-55	-124.92	3.11e-56	-127.81
19	Motif_50	GAIA	380	21.48	3053	8.6	2.5	1.4	7.85e-51	-115.37	4.47e-49	-111.33	2.35e-50	-114.27
20	Motif_55	PKIF	468	26.46	4289	12.08	2.19	1.2	5.66e-48	-108.79	3.22e-46	-104.75	1.61e-47	-107.74
21	Motif_25	FLHSAK	126	7.12	447	1.26	5.69	2.4	3.68e-47	-106.92	2.1e-45	-102.87	9.99e-47	-105.92
22	Motif_1	K[GT]AGK	302	17.07	2288	6.44	2.66	3.7	3.95e-45	-102.24	2.25e-43	-98.2	1.02e-44	-101.29
23	Motif_8	[VI]LDTJ	432	24.42	4043	11.39	2.15	2.1	1.84e-42	-96.1	1.05e-40	-92.05	4.57e-42	-95.19
24	Motif_10	LLL	346	19.56	2950	8.31	2.36	4	1.31e-41	-94.13	7.49e-40	-90.09	3.12e-41	-93.27
25	Motif_4	GLP	282	15.94	2307	6.5	2.46	4.3	5.35e-37	-83.52	3.05e-35	-79.48	1.22e-36	-82.69
26	Motif_5	SWP	147	8.31	788	2.22	3.76	6	1.34e-36	-82.6	7.67e-35	-78.55	2.95e-36	-81.81
27	Motif_42	AAAK	282	15.94	2477	6.98	2.29	1.5	2.46e-32	-72.78	1.4e-30	-68.74	5.18e-32	-72.04
28	Motif_49	VNWK	148	8.37	912	2.57	3.27	2.6	4.61e-31	-69.85	2.63e-29	-65.81	9.39e-31	-69.14
29	Motif_15	LHTA[KL]	57	3.22	140	0.39	8.25	11	8.29e-29	-64.66	4.73e-27	-60.62	1.63e-28	-63.98
30	Motif_56	GKEV	532	30.07	6353	17.89	1.68	0.65	5.99e-27	-60.38	3.41e-25	-56.34	1.14e-26	-59.74
31	Motif_18	GTIS	437	24.7	4937	13.91	1.78	1.3	1.2e-26	-59.69	6.83e-25	-55.64	2.2e-26	-59.08
32	Motif_37	RFC	39	2.2	73	0.21	10.8	12	1.64e-23	-52.46	9.36e-22	-48.42	2.93e-23	-51.89
33	Motif_23	FLGTI	229	12.95	2142	6.03	2.15	4.5	2.08e-23	-52.23	1.18e-21	-48.19	3.59e-23	-51.68
34	Motif_11	VCGETC	42	2.37	91	0.26	9.38	24	2.69e-23	-51.97	1.54e-21	-47.93	4.52e-23	-51.45
35	Motif_29	ALKAIS	23	1.3	11	0.03	40.1	15	6.2e-23	-51.14	3.53e-21	-47.09	1.01e-22	-50.65
36	Motif_53	MAL	449	25.38	5380	15.15	1.68	0.14	8.79e-23	-50.79	5.01e-21	-46.74	1.39e-22	-50.33
37	Motif_47	KHI	428	24.19	5085	14.32	1.69	3.4	2.09e-22	-49.92	1.19e-20	-45.88	3.21e-22	-49.49
38	Motif_27	GAVLKV	133	7.52	993	2.8	2.7	1.8	2.22e-21	-47.56	1.27e-19	-43.51	3.33e-21	-47.15
39	Motif_6	GTCN	49	2.77	155	0.44	6.43	16	4e-21	-46.97	2.28e-19	-42.93	5.84e-21	-46.59
40	Motif_13	CSW	45	2.54	143	0.4	6.41	13	1.81e-19	-43.15	1.03e-17	-39.11	2.58e-19	-42.8
41	Motif_19	GETCV	44	2.49	139	0.39	6.45	13	3.76e-19	-42.43	2.14e-17	-38.38	5.22e-19	-42.1
42	Motif_35	CYCR	47	2.66	162	0.46	5.91	9.4	4.47e-19	-42.25	2.55e-17	-38.21	6.06e-19	-41.95
43	Motif_12	VCT	45	2.54	152	0.43	6.03	12	1.29e-18	-41.19	7.36e-17	-37.15	1.71e-18	-40.91
44	Motif_40	ALW	189	10.68	1878	5.29	2.03	4.4	3.24e-17	-37.97	1.85e-15	-33.93	4.2e-17	-37.71
45	Motif_57	IAS	303	17.13	3896	10.97	1.56	4.4	1.39e-12	-27.3	7.9e-11	-23.26	1.76e-12	-27.07
46	Motif_48	IKV	275	15.55	3529	9.94	1.57	4.2	1.17e-11	-25.17	6.65e-10	-21.13	1.45e-11	-24.96
47	Motif_3	PGC	50	2.83	366	1.03	2.79	12	2.62e-09	-19.76	1.5e-07	-15.72	3.18e-09	-19.57
48	Motif_36	CRR	53	3	448	1.26	2.41	11	6.88e-08	-16.49	3.92e-06	-12.45	8.17e-08	-16.32
49	Motif_45	HIF	16	0.9	53	0.15	6.32	14	1.14e-07	-15.99	6.51e-06	-11.94	1.33e-07	-15.83
50	Motif_38	RRR	59	3.34	665	1.87	1.81	11	5.36e-05	-9.83	0.00306	-5.79	6.11e-05	-9.7
51	Motif_14	CVCV	94	5.31	1413	3.98	1.35	1.7	0.00519	-5.26	0.296	-1.22	0.0058	-5.15
52	Motif_41	GCS	39	2.2	548	1.54	1.46	11	0.0236	-3.74	1.35	0.3	0.0259	-3.65
53	Motif_26	EEEKRD	25	1.41	385	1.08	1.35	24	0.123	-2.1	7.01	1.95	0.132	-2.02

## Sheet: Big-Hemo
RANK	ID	CONSENSUS	TP	TP%	FP	FP%	ENR_RATIO	SCORE_THR	PVALUE	LOG_PVALUE	EVALUE	LOG_EVALUE	QVALUE	LOG_QVALUE
1	Motif_8	[VI]LDTJ	217	11.03	50	2.54	4.27	3.4	2.77e-26	-58.85	1.58e-24	-54.81	1.58e-24	-54.81
2	Motif_23	FLGTI	232	11.79	59	3	3.88	3.5	1e-25	-57.56	5.7e-24	-53.52	2.85e-24	-54.21
3	Motif_7	WKSFJK	172	8.74	34	1.73	4.94	3.9	1.05e-23	-52.91	6.01e-22	-48.86	2e-22	-49.96
4	Motif_1	K[GT]AGK	204	10.37	72	3.66	2.81	2.5	4.27e-16	-35.39	2.43e-14	-31.35	6.08e-15	-32.73
5	Motif_47	KHI	91	4.63	13	0.66	6.57	5.8	6.95e-16	-34.9	3.96e-14	-30.86	7.92e-15	-32.47
6	Motif_19	GETCV	67	3.41	6	0.31	9.71	9.1	1.96e-14	-31.56	1.12e-12	-27.52	1.86e-13	-29.31
7	Motif_4	GLP	248	12.61	109	5.54	2.26	4.1	6.8e-14	-30.32	3.87e-12	-26.28	5.53e-13	-28.22
8	Motif_43	LGKL	136	6.91	40	2.03	3.34	5.3	9.61e-14	-29.97	5.48e-12	-25.93	6.85e-13	-28.01
9	Motif_29	ALKAIS	135	6.86	40	2.03	3.32	1.1	1.49e-13	-29.54	8.48e-12	-25.49	9.43e-13	-27.69
10	Motif_15	LHTA[KL]	115	5.85	30	1.53	3.74	3.8	3.09e-13	-28.81	1.76e-11	-24.76	1.76e-12	-27.07
11	Motif_52	LWKT	111	5.64	31	1.58	3.5	6.3	4.54e-12	-26.12	2.59e-10	-22.07	2.35e-11	-24.47
12	Motif_39	LKKL	378	19.22	225	11.44	1.68	4.3	2.4e-10	-22.15	1.37e-08	-18.11	1.14e-09	-20.59
13	Motif_51	KKILG	250	12.71	135	6.86	1.85	1.8	2.39e-09	-19.85	1.36e-07	-15.81	1.05e-08	-18.38
14	Motif_34	VLK	236	12	125	6.35	1.88	3.1	2.66e-09	-19.74	1.52e-07	-15.7	1.08e-08	-18.34
15	Motif_33	KWK	205	10.42	103	5.24	1.98	3.6	3.14e-09	-19.58	1.79e-07	-15.54	1.19e-08	-18.24
16	Motif_40	ALW	49	2.49	7	0.36	6.25	11	3.71e-09	-19.41	2.11e-07	-15.37	1.25e-08	-18.2
17	Motif_20	JGKL	304	15.46	177	9	1.71	4.3	3.73e-09	-19.41	2.12e-07	-15.36	1.25e-08	-18.2
18	Motif_27	GAVLKV	52	2.64	9	0.46	5.3	6.9	8.96e-09	-18.53	5.11e-07	-14.49	2.84e-08	-17.38
19	Motif_57	IAS	122	6.2	49	2.49	2.46	4.6	1.12e-08	-18.3	6.41e-07	-14.26	3.37e-08	-17.2
20	Motif_6	GTCN	25	1.27	0	0	26	18	2.97e-08	-17.33	1.69e-06	-13.29	8.47e-08	-16.28
21	Motif_11	VCGETC	57	2.9	13	0.66	4.14	5.6	5.11e-08	-16.79	2.92e-06	-12.75	1.39e-07	-15.79
22	Motif_22	ISWIK	87	4.42	34	1.73	2.51	3.7	7.81e-07	-14.06	4.45e-05	-10.02	2.02e-06	-13.11
23	Motif_3	PGC	31	1.58	4	0.2	6.4	13	1.73e-06	-13.27	9.85e-05	-9.23	4.28e-06	-12.36
24	Motif_44	AKKAL	235	11.95	151	7.68	1.55	2.5	1.1e-05	-11.41	0.00063	-7.37	2.62e-05	-10.55
25	Motif_13	CSW	78	3.97	34	1.73	2.26	5.8	1.95e-05	-10.85	0.00111	-6.8	4.37e-05	-10.04
26	Motif_25	FLHSAK	108	5.49	55	2.8	1.95	0.86	1.99e-05	-10.82	0.00114	-6.78	4.37e-05	-10.04
27	Motif_55	PKIF	238	12.1	162	8.24	1.47	0.83	8.41e-05	-9.38	0.00479	-5.34	0.000177	-8.64
28	Motif_5	SWP	86	4.37	43	2.19	1.98	6	9.55e-05	-9.26	0.00544	-5.21	0.000194	-8.55
29	Motif_56	GKEV	36	1.83	11	0.56	3.08	6.4	0.000172	-8.67	0.00983	-4.62	0.000339	-7.99
30	Motif_36	CRR	101	5.13	57	2.9	1.76	5.4	0.000289	-8.15	0.0164	-4.11	0.000537	-7.53
31	Motif_53	MAL	484	24.61	382	19.42	1.27	2.7	0.000292	-8.14	0.0166	-4.1	0.000537	-7.53
32	Motif_50	GAIA	52	2.64	22	1.12	2.3	7.1	0.00032	-8.05	0.0183	-4	0.00057	-7.47
33	Motif_49	VNWK	69	3.51	34	1.73	2	2.9	0.000362	-7.92	0.0206	-3.88	0.000626	-7.38
34	Motif_41	GCS	70	3.56	38	1.93	1.82	5.8	0.00134	-6.62	0.0762	-2.57	0.00224	-6.1
35	Motif_24	LLKK	98	4.98	61	3.1	1.6	10	0.00207	-6.18	0.118	-2.14	0.00337	-5.69
36	Motif_54	KITK	44	2.24	21	1.07	2.05	7.4	0.00295	-5.83	0.168	-1.78	0.00467	-5.37
37	Motif_45	HIF	204	10.37	152	7.73	1.34	4.3	0.00337	-5.69	0.192	-1.65	0.0052	-5.26
38	Motif_16	LCEZ	119	6.05	81	4.12	1.46	2	0.00434	-5.44	0.247	-1.4	0.00651	-5.03
39	Motif_37	RFC	79	4.02	49	2.49	1.6	5.6	0.00503	-5.29	0.287	-1.25	0.00735	-4.91
40	Motif_32	KLL	362	18.4	297	15.1	1.22	1.9	0.00625	-5.07	0.356	-1.03	0.00891	-4.72
41	Motif_35	CYCR	112	5.69	80	4.07	1.4	2.9	0.0125	-4.39	0.71	-0.34	0.0173	-4.06
42	Motif_21	WKK	100	5.08	72	3.66	1.38	3.6	0.0195	-3.94	1.11	0.11	0.0265	-3.63
43	Motif_18	GTIS	210	10.68	172	8.74	1.22	1.4	0.029	-3.54	1.65	0.5	0.0384	-3.26
44	Motif_42	AAAK	280	14.23	240	12.2	1.17	0.026	0.0433	-3.14	2.47	0.9	0.0561	-2.88
45	Motif_12	VCT	83	4.22	65	3.3	1.27	5.3	0.0808	-2.52	4.61	1.53	0.102	-2.28
46	Motif_30	FKK	626	31.83	579	29.44	1.08	1.5	0.0919	-2.39	5.24	1.66	0.114	-2.17
47	Motif_9	MFTLK	8	0.41	3	0.15	2.25	6.8	0.113	-2.18	6.45	1.86	0.137	-1.99
48	Motif_14	CVCV	144	7.32	125	6.35	1.15	1.9	0.136	-2	7.74	2.05	0.161	-1.82
